1 ***Title***

2 **Ancient tropical extinctions contributed to the latitudinal diversity gradient**

3

4 ***Authors***

5 Andrea S. Meseguer<sup>1,2</sup>†\* and Fabien L. Condamine<sup>2</sup>†\*

6

7 ***Affiliations***

8 <sup>1</sup>INRA, UMR 1062 CBGP (INRA, IRD, CIRAD, Montpellier SupAgro), 755 Avenue du  
9 Campus Agropolis, 34988 Montferrier-sur-Lez, France.

10 <sup>2</sup>CNRS, UMR 5554 Institut des Sciences de l'Evolution de Montpellier (Université de  
11 Montpellier), Place Eugène Bataillon, 34095 Montpellier, France.

12 †These authors contributed equally.

13

14 ***Running title***

15 Asymmetric gradient of tropical extinction

16

17 ***Data accessibility statement***

18 All the data used in this manuscript are presented in the manuscript and its supplementary  
19 material or have been published or archived elsewhere.

20

21 ***Corresponding authors (\*)***

22 Andrea S. Meseguer (asanchezmeseguer@gmail.com), Fabien L. Condamine  
23 (fabien.condamine@gmail.com)

24

25 **Abstract**

26 Biodiversity currently peaks at the equator, decreasing towards the poles. Growing fossil  
27 evidence suggest that this hump-shaped latitudinal diversity gradient (LDG) has not been  
28 persistent through time, with similar species diversity across latitudes flattening out the LDG  
29 during past “greenhouse” periods. This provides a new starting point for LDG research. Most  
30 studies assume the processes shaping the LDG have acted constantly through time and seek to  
31 understand why diversity accumulated in the Holarctic at lower levels than at the equator, *e.g.*  
32 as the result of limited dispersal, or higher turnover in Holarctic regions. However, fossil  
33 investigations suggest that we need to explain when and why diversity was lost at high  
34 latitudes to generate the LDG. Unfortunately, diversity lost scenarios in the Holarctic have  
35 been repeatedly proposed but not yet clearly demonstrated. Here, we outline the ‘asymmetric  
36 gradient of extinction’ (AGE) framework, which contextualize previous ideas behind the  
37 LDG in the frame of a time-variable scenario. We suggest the current steep LDG may be  
38 explained by the extinction of clades adapted to warmer conditions from the new temperate  
39 regions formed in the Neogene, together with the equator-ward dispersal of organisms  
40 tracking their own climatic preferences, when tropical biomes became restricted to the  
41 equator. Conversely, high rates of speciation and pole-ward dispersal can account for the  
42 formation of an ancient flat LDG during the Cretaceous–Paleogene greenhouse period.  
43 Phylogenies and fossils of the Testudines, Crocodylia and Lepidosauria support the AGE  
44 scenario and showed the LDG to have varied over time, with high latitudes serving as a  
45 source of tropical diversity but suffering disproportionate extinction during transitional  
46 periods to cold climate. Our results demonstrate that the inclusion of fossils in  
47 macroevolutionary studies allows detecting extinction events less detectable in analyses  
48 restricted to present-day data only.

49

50 **Keywords:** climate change; fossils; biodiversity; dispersal; extinction; Holarctic; niche;

51 phylogeny; speciation; tropics.

52

## 53 **Introduction**

54 The current increase in species richness from the poles towards the equator, known as the  
55 latitudinal diversity gradient (LDG), is one of the most conspicuous patterns in ecology and  
56 evolution. This pattern has been described for microbes, insects, vertebrates, and plants, and  
57 for marine, freshwater, and terrestrial ecosystems<sup>1-6</sup>.

58 For decades, it has been thought that the modern-type steep LDG (with higher  
59 diversity at the equator) persisted throughout the Phanerozoic (the last 540 million years),  
60 even if the gradient was sometimes shallower<sup>7</sup>, based on published fossil record studies<sup>8,9</sup>.  
61 However, the methodological limitations of fossil sampling have called this conclusion into  
62 question. Analyses controlling for sampling bias have suggested that, for many groups, the  
63 LDG was less marked in the past than it is today, flat (*i.e.* with similar species diversity across  
64 latitudes) or even developed a paleotemperate peak during some periods in the past (see  
65 Mannion *et al.*, (2014) for a review). This sampling-corrected flatter LDG in deep time has  
66 been demonstrated for non-avian dinosaurs<sup>11</sup>, mammals<sup>12,13</sup>, tetrapods<sup>14</sup>, insects<sup>15-17</sup>,  
67 brachiopods<sup>18-20</sup>, bivalves<sup>21</sup>, coral reefs<sup>22</sup>, crocodiles<sup>23</sup>, turtles<sup>24,25</sup>, and plants<sup>26-28</sup>. The pattern  
68 emerging from fossil studies also suggests that steep LDGs, such as that currently observed,  
69 have been restricted to the relatively small number of short “coldhouse” periods during the  
70 history of the Earth: the Ordovician/Silurian, the Carboniferous/Permian, the end of the  
71 Jurassic, and the Neogene. Most of the Phanerozoic has instead been characterized by warm  
72 greenhouse climates associated with a flatter LDG1 (**Fig. 1**).

73 This recent fossil evidence now provides a new starting point for LDG research. Most  
74 hypotheses on the origin of the LDG are based on the assumptions that (*i*) the processes  
75 shaping the LDG have acted constantly through time and (*ii*) equatorial regions are the source  
76 of world diversity<sup>29,30</sup>, with the LDG resulting from lower levels of diversity accumulation in  
77 the Holarctic than at the equator through time<sup>7,31,32</sup>. Previous studies have explained the LDG

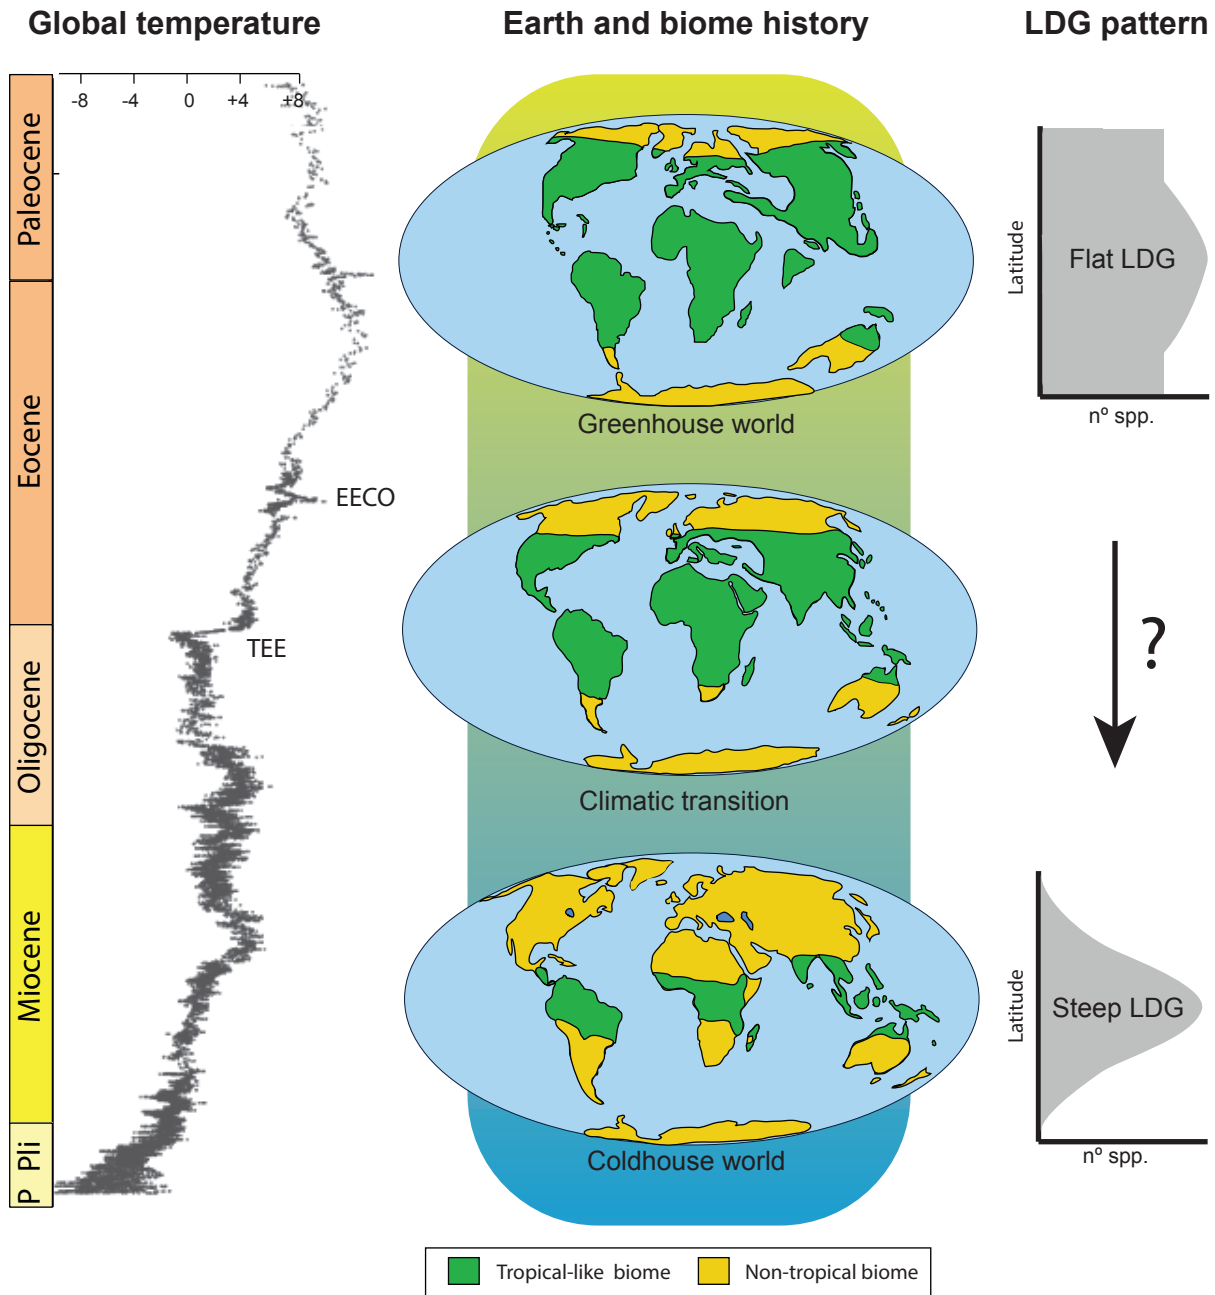

**Figure 1 | Changes in global temperature and extension of the tropical belt during the Cenozoic, in relation with the shape of the LDG.** Early Cenozoic global temperatures were higher than today and paratropical conditions extended over northern and southern latitudes. From the early Eocene climatic optimum (EECO; ca. 53-51 Ma), a global cooling trend intensified on Earth and culminated with the Pleistocene glaciations. Global cooling was punctuated by sharp declines of temperatures, such as the terminal Eocene Event (TEE, ca. 33.9 Ma) and periods of relative warmth. Warm-equable regimes got then restricted to the equator. The LDG evolved following these global changes; during greenhouse periods diversity was uniform across latitudes, such that the LDG flattened, while in cold periods diversity peaked at the equator (a steep LDG) (Mannion et al., 2014). The question mark denotes the focus of this study, which is to unveil the processes that mediated the transition between a flat and steep LDG. The relative temperature curve of the Cenozoic is adapted from Zachos et al., (2008). Maps represent the extension of the tropical belt and Earth tectonic changes as derived from Ziegler et al., (2003) and Morley (2007). Abbrev.: P=Pleistocene, Pli=Pliocene

78 as a result of greater tropical diversification and limited dispersal out of the equatorial  
79 region<sup>7,31,33</sup>, or by high rates of turnover in the Holarctic (*i.e.* similar high speciation ( $\lambda$ ) and  
80 extinction ( $\mu$ ) rates;  $\lambda \approx \mu$ ), all keeping diversity levels in this region low over time (**Table 1**),  
81 for amphibians<sup>34,35</sup>, birds<sup>32,36,37</sup>, butterflies<sup>38</sup>, conifers<sup>39</sup>, fishes<sup>40</sup>, mammals<sup>33,37</sup>, and  
82 lepidosaurs<sup>41</sup>, for example. However, the recent fossil investigations showing, for many  
83 lineages, similar high diversity levels in the Holarctic and at the equator in the past suggest  
84 we do not necessarily need to explain why diversity accumulated at slower rates in the  
85 Holarctic through time, but the question being how and when diversity was lost at high  
86 latitudes, giving rise to the current shape of the LDG<sup>10</sup>?

87 Diversity losses in the Holarctic have been traditionally considered to underlie the  
88 LDG<sup>37</sup>. They were initially attributed to Pleistocene glaciations<sup>42</sup>, but this hypothesis has been  
89 called into question by the finding that the LDG substantially predates the Pleistocene<sup>7</sup>. More  
90 ancient extinctions have also been considered<sup>43–49</sup>. For example, Hawkins *et al.* (2006)<sup>46</sup>  
91 suggested that the avian LDG resulted from the differential extirpation of older warm-adapted  
92 clades from the temperate regions newly formed in the Neogene. Pyron (2014)<sup>41</sup> suggested  
93 that higher temperate extinction represents a dominant force for the origin and maintenance of  
94 latitudinal gradients. More recently, Pulido-Santacruz & Weir (2016)<sup>49</sup> proposed the  
95 terrestrial LDG is largely the effect of a post-Eocene increase in extinction rates at high  
96 latitudes resulting from the cooling Cenozoic trend. Unfortunately, using phylogenies alone,  
97 these and other studies on the LDG have not clearly demonstrated diversity losses in the  
98 Holarctic but instead high regional turnover<sup>33,35–39,50</sup>. Nonetheless, high turnover can only  
99 explain a slow accumulation of lineages, with one fauna being replaced by another, but does  
100 not explain diversity decline (*i.e.* a reduction in the net number of species). Diversity declines  
101 occur when extinction exceeds speciation, resulting in negative net diversification rates  
102 ( $r = \lambda - \mu$ ;  $r < 0$ ). Accordingly, ‘diversity loss’ hypotheses need to be differentiated in the

**Table 1.** Predictions of the most common LDG hypotheses, including the *Asymmetric gradient of tropical extinction* (AGE) hypothesis proposed in this study. The main evolutionary hypotheses published to date can be classified according to three criteria: **(1)** the mechanisms behind regional differences in species richness<sup>7</sup>, including explanations based on evolutionary time, on dispersal ( $d$ ), and on diversification ( $r = \lambda, \mu$ ). Explanations based on evolutionary time assume that most groups originated in the tropics and had less time to diversify in the temperate regions<sup>90</sup>, but regional differences in evolutionary rates are not invoked. Hypotheses focussing on the role of geographic movements ( $d$ ), include the “*tropical niche conservatism*” model, assuming that most groups originated in the tropics and the LDG results from limited dispersal to the temperate regions, as only few of tropical species succeeded to adapt to the temperate regimes<sup>30</sup>. The “*Into the tropics*” model assumes instead the LDG results from dispersals towards the equator<sup>38,50</sup>. Hypotheses that emphasize the LDG is generated by regional differences in net diversification rates (the composite value  $r = \lambda - \mu$ ), being higher in the tropics<sup>32,34</sup> assume that the outstanding tropical diversity could be the outcome of higher rates of speciation in the tropics than in the extra-tropical regions ( $\lambda_t > \lambda_e$ ) under the “*cradle of diversity*” hypothesis, and/or could result from lower rates of extinction ( $\mu_t < \mu_e$ ) under the “*museum of diversity*” hypothesis<sup>66</sup>. The LDG could also result from higher turnover rates (*i.e.* higher  $\lambda$  and  $\mu$ ) in the Holarctic<sup>37</sup>. Diversification and dispersal hypotheses are not mutually exclusive. The “*out of the tropics*” model synthesizes this idea that the tropics are regarded as both a cradle and a museum, with lineages preferentially originating in the tropics and expanding over time into high latitudes<sup>29,65</sup>. In addition, evolutionary hypotheses could be classified according to **(2)** the rate at which processes acted through time; most studies assumed evolutionary processes acted constantly through time to explain the LDG. The AGE model, conversely, includes various diversification and dispersal parameters for each temporal interval (the transition from coldhouse to greenhouse, and *viceversa*). **(3)** Finally, the hypotheses can be classified according to the source of tropical diversity: “*Lower Holarctic species accumulation*” hypotheses assume that the equator is the source of world diversity and species accumulated at slower rates on the higher latitudes. Conversely, “*Holarctic diversity loss*” hypothesis assumes the Holarctic was also a source of diversity but this diversity was lost at some periods of the evolutionary history (e.g. climate change from greenhouse to coldhouse).

| 1. mechanism           | Time ( $t$ )                                                                                                              | Differences in $r$                                                            |                                                                       |                                                                         | Differences in $d$                             |                                                  |                                                                                                      | Both                                                                               |                                                                                    |
|------------------------|---------------------------------------------------------------------------------------------------------------------------|-------------------------------------------------------------------------------|-----------------------------------------------------------------------|-------------------------------------------------------------------------|------------------------------------------------|--------------------------------------------------|------------------------------------------------------------------------------------------------------|------------------------------------------------------------------------------------|------------------------------------------------------------------------------------|
| 2. rate                | Time-constant models                                                                                                      |                                                                               |                                                                       |                                                                         |                                                |                                                  |                                                                                                      | Time-variable models                                                               |                                                                                    |
| 3. source              | Lower Holarctic species accumulation                                                                                      |                                                                               |                                                                       |                                                                         |                                                |                                                  |                                                                                                      | Holarctic diversity loss                                                           |                                                                                    |
| Hypothesis (reference) | <i>Time for speciation</i> <sup>90</sup>                                                                                  | <i>Cradle of diversity</i> <sup>66</sup>                                      | <i>Museum of diversity</i> <sup>66</sup>                              | <i>Holarctic turnover</i> <sup>37</sup>                                 | <i>Into the tropics</i> <sup>38,50</sup>       | <i>Tropical niche conservatism</i> <sup>32</sup> | <i>Out of the tropics</i> <sup>29,65</sup>                                                           | <i>Asymmetric gradient of extinction</i>                                           |                                                                                    |
|                        |                                                                                                                           |                                                                               |                                                                       |                                                                         |                                                |                                                  |                                                                                                      | <b>Coldhouse to greenhouse transition</b>                                          | <b>Greenhouse to coldhouse transition</b>                                          |
| Predictions            | $t_{\text{trop}} > t_{\text{temp}}$<br>( $r_{\text{trop}} = r_{\text{temp}}$ )<br>( $d_{\text{trtp}} = d_{\text{tptp}}$ ) | $r_e > r_h$<br>( $\lambda_e > \lambda_h$ )<br>$d_{\text{ch}} = d_{\text{he}}$ | $r_e > r_h$<br>( $\mu_e < \mu_h$ )<br>$d_{\text{ch}} = d_{\text{he}}$ | $r_h = 0$<br>( $\mu_h = \lambda_h$ )<br>$d_{\text{ch}} = d_{\text{he}}$ | $r_e = r_h$<br>$d_{\text{eh}} < d_{\text{he}}$ | $r_e = r_h$<br>$d_{\text{eh}} > d_{\text{he}}$   | $r_e > r_h$<br>( $\lambda_e > \lambda_h$ )<br>( $\mu_e < \mu_h$ )<br>$d_{\text{ch}} > d_{\text{he}}$ | $r_e < r_h$<br>( $\mu_h < \lambda_h; r_h > 0$ )<br>$d_{\text{ch}} > d_{\text{he}}$ | $r_e > r_h$<br>( $\mu_h > \lambda_h; r_h < 0$ )<br>$d_{\text{ch}} < d_{\text{he}}$ |

Abbreviations:  $\lambda$  = speciation,  $\mu$  = extinction,  $d$  = dispersal,  $t$  = time, e = equatorial, h = Holarctic, trop = Tropical biome, temp = Temperate biome.

103 literature from ‘high turnover’ scenarios. The perceived difficulty for inferring negative  
104 diversification rates from present-day phylogenetic data<sup>51,52</sup> and the assumption that diversity  
105 levels were always lower in the Holarctic than at the equator have resulted in ‘diversity loss’  
106 hypotheses being repeatedly proposed but seldom demonstrated. Meanwhile, numerous fossil  
107 investigations have detected signatures of extinction and diversity loss in the Northern  
108 Hemisphere. For instance, Archibald *et al.*<sup>15,16</sup> sampled insect diversity at an Eocene site in  
109 Canada, and in present-day temperate Massachusetts (USA) and tropical sites of Costa Rica.  
110 Insect diversity was higher at the Eocene paleotropical site than the modern temperate  
111 locality, and comparable to the modern-day tropical locality, suggesting that post-Eocene  
112 insects have thus suffered greater levels of extinction in the Nearctic regions than around the  
113 equator. This pattern is consistent with results of other studies on various taxonomic groups,  
114 including birds<sup>53</sup>, invertebrates<sup>15,16,54</sup>, mammals<sup>12,13,55</sup> and plants<sup>56–58</sup>. However, fossil studies  
115 are generally restricted to a geographic and temporal scale, which makes difficult to  
116 extrapolate local inferences of extinction in the context of the LDG.

117 Here we capitalize on the current knowledge and we aim at: (1) outlining a new  
118 framework for studying the LDG, the ‘asymmetric gradient of extinction’ (AGE) hypothesis,  
119 which formalizes and expands previous hypotheses about the contribution of extinctions to  
120 the LDG in the context of a time-variable pattern; and (2) testing the predictions of the AGE  
121 hypothesis with three tetrapod groups.

122

### 123 ***From a flat to a hump-shaped LDG: an asymmetric gradient of extinction***

124 Over the Earth’s history, the geographic extent of the tropical biome around the equator has  
125 fluctuated, with periods of pole-ward expansion during which warm paratropical conditions  
126 appeared at high latitudes, followed by periods of equator-ward contractions<sup>59–63</sup> (**Fig. 1**). To  
127 account for these biodiversity changes, we propose to include a temporal component to study



128 the LDG in which prevailing speciation, extinction and dispersal dynamics change between  
129 warm and cold intervals. The AGE hypothesis makes the following main postulates (P) during  
130 climatic transitions towards cooler climates (**Fig. 2; Table 1**): (**P1**) extinction rate exceeds the  
131 speciation rate at high latitudes ( $r_H$ ), *i.e.* declining diversity ( $r_H < 0$ ), while the equatorial ( $r_E$ )  
132 regions remain stable, and (**P2**) the rate of dispersal ‘into the equator’ is greater than that ‘out  
133 of the equator’ ( $d_{HE} > d_{EH}$ ), thus triggering the formation of a steep LDG. Conversely,  
134 during the transition to greenhouse periods, different processes drove the formation of a flat  
135 gradient, and AGE postulates: (**P3**) diversification rates increase in the new paratropical  
136 regions ( $r_E < r_H$ ), and (**P4**) ‘out of the tropical’ dispersals increase over ‘into the equator’  
137 migrations ( $d_{HE} < d_{EH}$ ).

138 For instance, the last 100 million have witnessed the contraction of tropical conditions  
139 towards the equator, due to the global cooling since the latest Cretaceous–early Cenozoic  
140 period (the most recent greenhouse period), culminating in the Pleistocene glaciations<sup>64</sup>.  
141 According to the AGE hypothesis, the expansion of tropical-like conditions to higher latitudes  
142 induced species diversification in the new paratropical areas (**Fig. 2a**) and facilitated  
143 movements within the broad ‘tropical belt’, such that tropical equatorial clades were able to  
144 disperse ‘out of the equator’ into high-latitude warm regions<sup>29,65</sup>. An equable Cretaceous-  
145 early Cenozoic greenhouse climate thus triggered the formation of a flat LDG (**Fig. 2a**). By  
146 contrast, tropical biome retractions following the climate cooling induced periods of declining  
147 diversity at high latitudes (where climate change was more intensively felt), and initiated  
148 biotic movements ‘into the equator’ (**Fig. 2b**). Extinction rates were high for tropical-adapted  
149 lineages at high latitudes, but lower for low-latitude tropical lineages. Climate change would  
150 thus have driven the development of an asymmetric gradient of extinction (AGE) and  
151 dispersal within the tropical biome, and mediated the formation of a steep LDG (**Fig. 2c**).

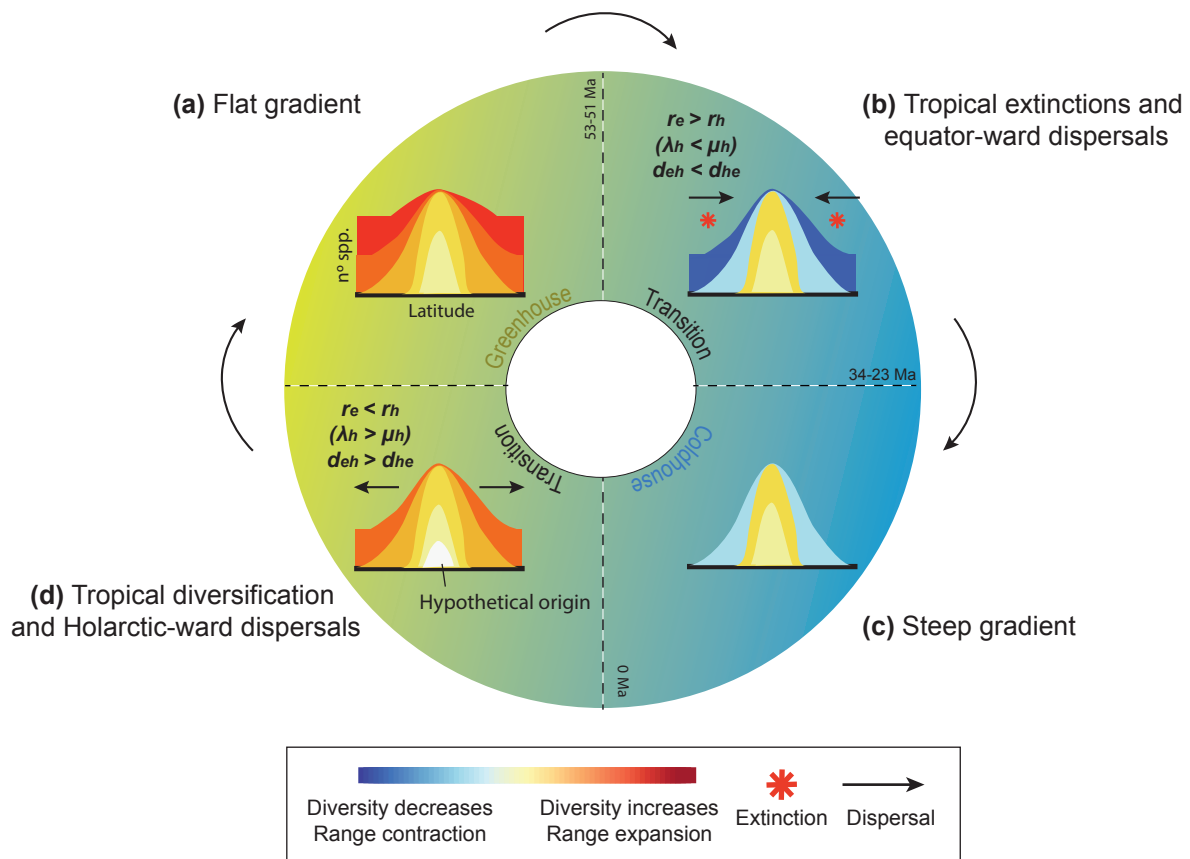

**Figure 2 | Prevalent evolutionary processes behind the latitudinal diversity gradient under the AGE time-variable framework.** The graphic shows the hypothetical change in evolutionary dynamics (diversification “r”, speciation “λ”, extinction “μ” and dispersal “d”) between Holarctic and equatorial regions (denoted with “h” and “e” subscripts, respectively) and across main climatic intervals: **a**, the greenhouse late Cretaceous-early Cenozoic period. **b**, the late Eocene-Oligocene climatic transition. **c**, the Neogene coldhouse interval. **d**, the past and future transition to greenhouse climates. For each period, inset Figs. represent the distribution of species richness across latitudes (the LDG shape) and the hypothetical change in global evolutionary dynamics under the AGE hypothesis.

152 The AGE hypothesis attempts to reconcile previous contending hypotheses on the  
153 origin of the LDG by placing them in a temporal scenario (**Table 1**). For instance, there is  
154 controversial support around the tropics being ‘*cradle*’ or ‘*museum of diversity*’<sup>66</sup>, and  
155 dispersal prevailing ‘*out of*’<sup>29,65</sup> or ‘*into the tropics*’<sup>38,41,50</sup>. The AGE hypothesis alternatively  
156 invokes the ‘*museum of diversity*’ regarding the equatorial tropics as refuge during coldhouse  
157 transitions, but also the ‘*cradle of diversity*’ during greenhouse periods. Similarly, the  
158 hypothesis invokes ‘*out of the equator*’ dispersals during greenhouse transitions and ‘*into the*  
159 *equator*’ dispersals during coldhouse transitions. The AGE hypothesis also assumes tropical  
160 niche conservatism due to physiological limits<sup>30,31</sup> as we postulate that most of the tropical-  
161 adapted taxa at high latitudes were unable to adapt and either went extinct or suffered  
162 restrictions of their distributions when the tropical biome retreated towards the equator.  
163 Accordingly, the AGE hypothesis focuses on the fate of tropical-adapted clades under  
164 variable climate conditions but does not apply for groups having evolved the appropriate  
165 adaptations to cope with climate change, e.g.<sup>67,68</sup>.

166 Here, we used comparative methods for both phylogeny-based and fossil-based  
167 datasets to test the predictions of the AGE hypothesis for the Testudines, Crocodylia and  
168 Lepidosauria. The modern-day Crocodylia and Lepidosauria comprise mostly tropical-adapted  
169 species with a classic LDG pattern as shown by an accumulation of diversity at equatorial  
170 latitudes<sup>41,44</sup>. We evaluated the applicability of our framework to subtropical taxa as well, by  
171 extending the study to Testudines, a group displaying a hump-shaped gradient of diversity  
172 today centred on subtropical latitudes (10°S–30°N)<sup>69</sup>. By contrast, the paleolatitudinal  
173 distribution of turtles was concentrated in the Holarctic (30–60°N) during the Cretaceous<sup>24,25</sup>.  
174 All these lineages are ancient and likely experienced climatic transitions during the early  
175 Cenozoic<sup>23,25,41,44,69</sup>. They display contrasting patterns of species richness: turtles and  
176 crocodiles are species-poor (330 and 25 species, respectively), while lepidosaurs include a

177 large number of species (9500+ species) and have a rich fossil record extending back to the  
178 Triassic (Early Cretaceous for crocodiles), providing information about the variation of  
179 latitudinal species richness accumulation during their evolutionary history.

180

## 181 **Results**

### 182 *Phylogeny-based diversification analyses: are diversification rates higher at the equator?*

183 According to current distribution data, the species richness of turtles, lepidosaurs and  
184 crocodiles peaks near the equator, with 84% of all extant species living in the tropics, only  
185 15% living in temperate regions and 1% spanning both biomes. We classified each species  
186 reported in the phylogeny (Supplementary Tables 1-3) as living close to the equator (the  
187 modern-day tropical biome) or the Holarctic and Southern Hemisphere (the modern-day  
188 temperate biome). For turtles, there were 239 tropical species, 84 temperate and 6 spanning  
189 both biomes (7 were marine species). For lepidosaurs, there were 7955 tropical species, 1337  
190 temperate and 124 spanning both biomes. The species-poor crocodile clade had only 23  
191 tropical and two temperate species.

192 We analyzed differences in diversification rates between the Holarctic and equatorial  
193 regions, with the binary state change speciation and extinction model ‘BiSSE’<sup>70,71</sup>, see  
194 *Methods*. We did not use the geographic state change speciation and extinction model<sup>72</sup>,  
195 which is appropriate for dealing with widespread species, because most of the species in our  
196 datasets were endemic to the Holarctic or equatorial regions, and, for a character state to be  
197 considered in SSE models, it must account for at least 10% of the total diversity<sup>73</sup>. We did not  
198 apply the BiSSE model to crocodiles, because simulation studies have shown that trees  
199 containing fewer than 300 species may have to weak a phylogenetic signal to generate  
200 sufficient statistical power<sup>73</sup>.

201 We first used the time-constant BiSSE model, which is generally used in studies of the  
202 LDG. For turtles, net diversification rates were higher in the Holarctic than at the equator  
203 (**Table 2**, Supplementary Fig. 1a), but this difference was not significant, and rates of  
204 dispersal '*into the equator*' were ten times higher than those '*out of the equator*'. For  
205 lepidosaurs, a similar dispersal pattern was recovered, but net diversification rates were  
206 significantly higher towards the equator (Supplementary Fig. 1b). We tested the AGE  
207 hypothesis by introducing two shift times, at 51 and 23 million years ago (Ma), to detect  
208 differences in diversification dynamics between greenhouse, transitional, and coldhouse  
209 periods. This model indicated that the net diversification of turtles was similar in the Holarctic  
210 and at the equator, whereas it was lower in the Holarctic for lepidosaurs until the coldhouse  
211 period, when Holarctic diversification increased (**Table 2**, Supplementary Fig. 2). Dispersal  
212 was considered to be symmetric between regions (*into the equator* = *out of the equator*)  
213 during greenhouse periods, and asymmetric (*into the equator* > *out of the equator*) during the  
214 climatic transition and coldhouse period. The same patterns were obtained for analyses with  
215 the same model but with different combinations of shift times (51/66 Ma and 34/23 Ma;  
216 Supplementary Fig. 3).

217

### 218 ***Fossil-based diversification analyses: evidence for ancient tropical extinctions?***

219 We also analyzed differences in diversification rates between the Holarctic and equatorial  
220 regions based exclusively on fossil data. The turtle fossil dataset comprised 4084 occurrences  
221 for 420 genera (65 extant and 355 extinct; Supplementary Table 4). The lepidosaur fossil  
222 dataset comprised 4798 occurrences for 638 genera (120 extant and 518 extinct;  
223 Supplementary Table 5). The crocodile fossil dataset comprised 1596 occurrences for 121  
224 genera (9 extant and 112 extinct; Supplementary Table 6). We first inferred global  
225 diversification dynamics by analyzing the fossil datasets as a whole with a Bayesian approach

**Table 2.** Results of the diversification and biogeographic analyses performed in this study for the transition from greenhouse to coldhouse climates. Abbreviations:  $\lambda$  = speciation,  $\mu$  = extinction,  $d$  = dispersal,  $R\mu$  = range extirpations, e = equatorial, h = Holarctic.

|                          | Data source      | Model                 | Turtles                                                                              | Squamates                                                                            | Crocodiles                                                                           |
|--------------------------|------------------|-----------------------|--------------------------------------------------------------------------------------|--------------------------------------------------------------------------------------|--------------------------------------------------------------------------------------|
|                          |                  |                       | Green- to coldhouse transition                                                       | Green- to coldhouse transition                                                       | Green- to coldhouse transition                                                       |
| Diversification analyses | Fossil           | PyRate                | $\lambda_e > \lambda_h$<br>$\mu_e < \mu_h$<br>$r_e > r_h$                            | $\lambda_e = \lambda_h$<br>$\mu_e > \mu_h$<br>$r_e < r_h$                            | $\lambda_e > \lambda_h$<br>$\mu_e < \mu_h$<br>$r_e > r_h$                            |
|                          | Present          | BiSSE (time-variable) | $\lambda_e = \lambda_h$<br>$\mu_e = \mu_h$<br>$d_{he} > d_{eh}$                      | $\lambda_e > \lambda_h$<br>$\mu_e < \mu_h$<br>$d_{he} > d_{eh}$                      | -                                                                                    |
|                          | Present          | BiSSE (constant)      | $\lambda_e < \lambda_h$<br>$\mu_e = \mu_h$<br>$d_{he} > d_{eh}$                      | $\lambda_e < \lambda_h$<br>$\mu_e < \mu_h$<br>$d_{he} > d_{eh}$                      | -                                                                                    |
| Biogeographic analyses   | Present          | DEC                   | $R\mu_e < R\mu_h$ ( $R\mu_e < R\mu_h$ )*<br>$d_{he} < d_{eh}$ ( $d_{he} < d_{eh}$ )* | $R\mu_e > R\mu_h$ ( $R\mu_e = R\mu_h$ )*<br>$d_{he} < d_{eh}$ ( $d_{he} = d_{eh}$ )* | $R\mu_e = R\mu_h$ ( $R\mu_e = R\mu_h$ )*<br>$d_{he} = d_{eh}$ ( $d_{he} = d_{eh}$ )* |
|                          | Present + fossil | DEC fossil            | $R\mu_e < R\mu_h$ ( $R\mu_e < R\mu_h$ )*<br>$d_{he} > d_{eh}$ ( $d_{he} > d_{eh}$ )* | $R\mu_e > R\mu_h$ ( $R\mu_e < R\mu_h$ )*<br>$d_{he} < d_{eh}$ ( $d_{he} > d_{eh}$ )* | $R\mu_e < R\mu_h$ ( $R\mu_e < R\mu_h$ )*<br>$d_{he} > d_{eh}$ ( $d_{he} > d_{eh}$ )* |

\* Prevalent dynamics when the number of events is calculated relative to the number of taxa currently distributed in each region

226 to inferring the temporal dynamics of origination and extinction rates based on fossil  
227 occurrences<sup>74</sup> (see *Methods*). For turtles, origination rates peaked during the Jurassic,  
228 subsequently decreasing until the present day. Extinction rates were generally low and  
229 constant during the Mesozoic, but increased during the coldhouse periods of the Jurassic and  
230 Paleogene, resulting in negative net diversification during the Paleogene (**Fig. 3, Table 2,**  
231 **Supplementary Figs. 4, 5**). For lepidosaurs, origination rates peaked in the Jurassic and Late  
232 Cretaceous, whereas extinction increased steadily until the Late Cretaceous. In the Paleogene,  
233 net diversification approached zero, suggesting a high rate of turnover (**Fig. 3, Supplementary**  
234 **Figs. 6, 7**). Crocodile origination peaked in the Early Cretaceous, subsequently decreasing  
235 towards the present day, and extinction rates were generally low and constant. We also  
236 identified diversity losses in the Paleogene extending to the present, suggesting that  
237 crocodiles are still in a phase of declining diversity (**Fig. 3, Supplementary Figs. 8, 9**).

238 We performed additional analyses with different subsets of the three fossil datasets, to  
239 separate the speciation and extinction signals between geographic regions (equator or  
240 Holarctic) and ecological conditions (temperate or tropical, see *Methods*). These analyses  
241 showed that the diversity losses experienced by turtles and crocodiles during the Paleogene  
242 were mostly attributable to species living in the Holarctic and under tropical conditions (**Figs.**  
243 **4, 5, Table 2**). The global diversity loss inferred for crocodiles during the Neogene was  
244 attributed to taxa living in both the Holarctic and equatorial regions (adapted to temperate and  
245 tropical conditions respectively), providing further support for the hypothesis that this whole  
246 group is in decline. For all groups, temperate taxa have been estimated to have high rates of  
247 diversification during the Oligocene, but lower rates during the Neogene. For the equatorial  
248 datasets, extinction and speciation rates decreased over time, resulting in constant net  
249 diversification rates (except for lepidosaurs, which displayed a decrease in diversification  
250 during the Paleogene, followed by an increase in diversification during the Neogene).

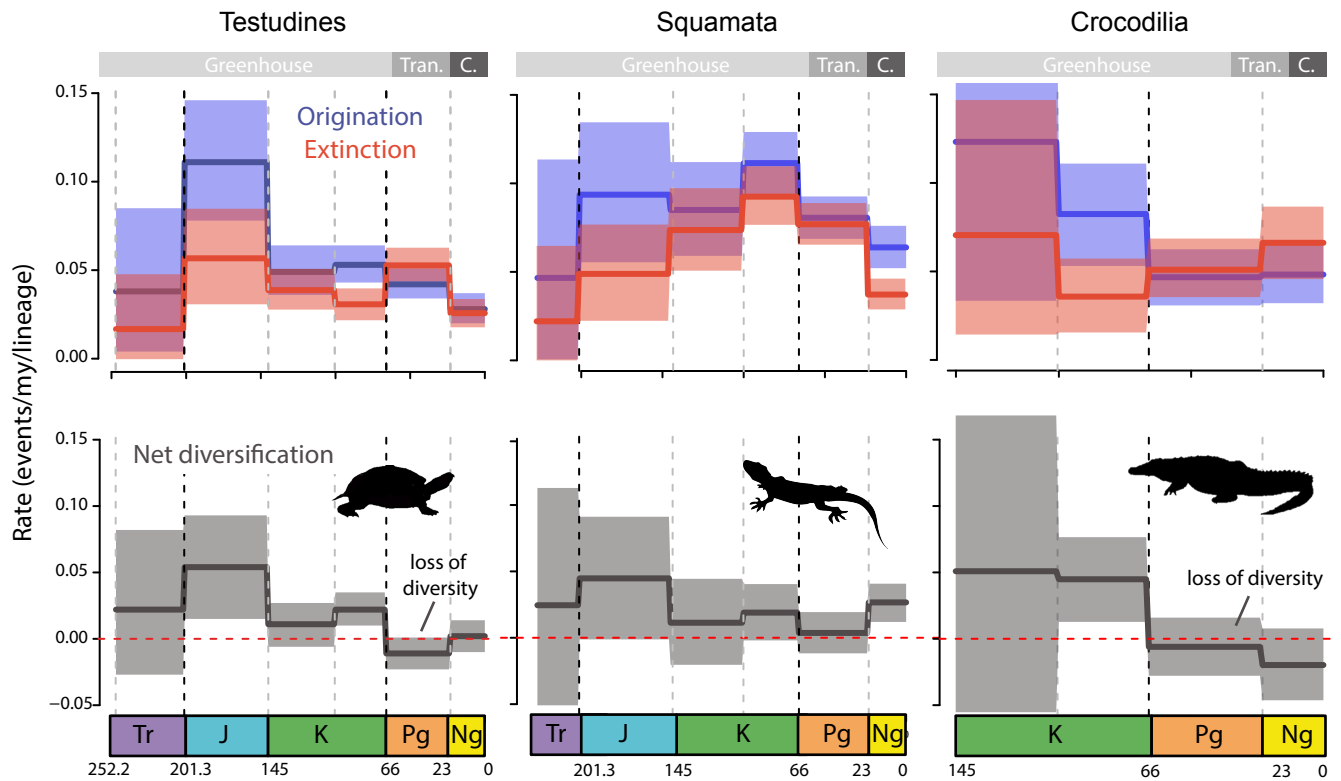

**Figure 3 | Global pattern of turtles, squamates and crocodiles diversification through time based on the fossil record, and analysed with a Bayesian model.** Origination (blue) and extinction (red) rates were estimated using time bins as defined by epochs of the geological timescale (on the top, main climatic periods are shown as follows: Greenhouse, Tran. = climatic transition, and C. = coldhouse). Solid lines indicate mean posterior rates, whereas the shaded areas show 95% credibility intervals. Net diversification rates (black) are the difference between origination and extinction. The vertical lines indicate the boundaries between geological periods. Tr, Triassic; J, Jurassic; K, Cretaceous; Pg, Paleogene; and Ng, Neogene.



## Holarctic vs. equatorial

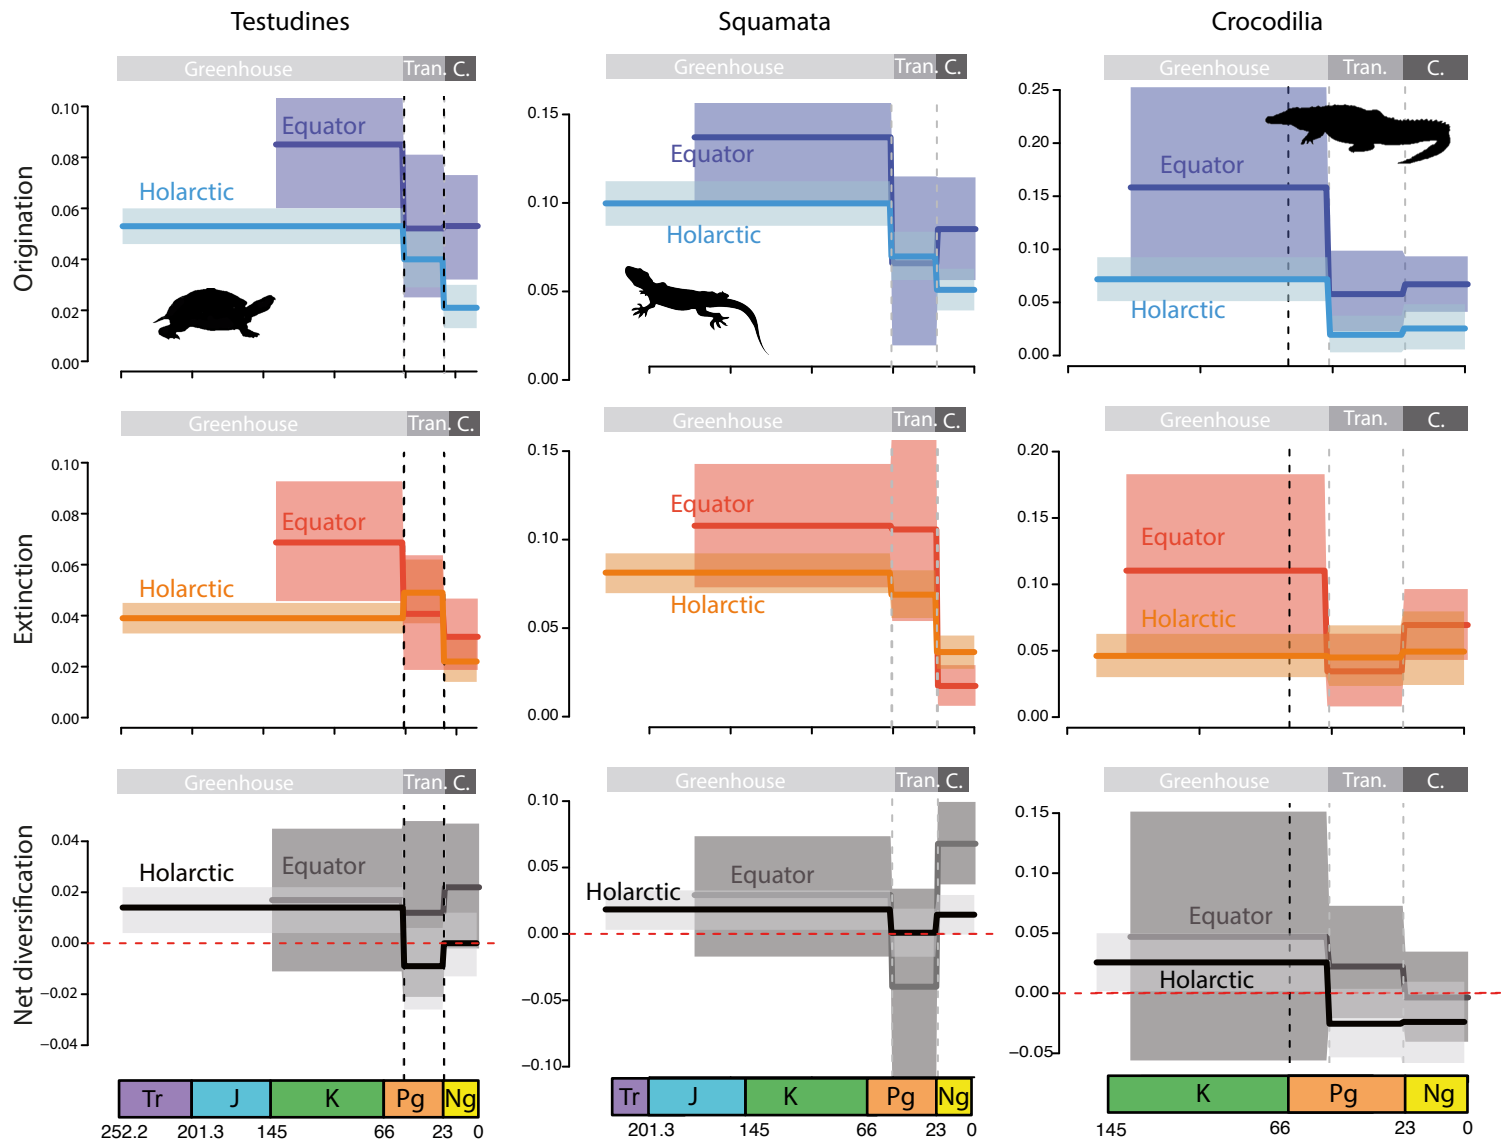

**Figure 4 | Global pattern of turtle, squamate and crocodile diversification between Holarctic and equatorial regions, based on the fossil record.** Diversification dynamics are compared between fossils distributed in Holarctic and equatorial regions. Origination (blue) and extinction (red) rates were estimated using time bins as defined by the main climatic intervals since the Mesozoic (on the top, climatic periods are shown as follows: Greenhouse, Tran. = climatic transition, and C. = coldhouse). Solid lines indicate mean posterior rates, whereas the shaded areas show 95% credibility intervals. Net diversification rates (black) are the difference between origination and extinction. The vertical lines indicate the boundaries between climatic intervals. Tr, Triassic; J, Jurassic; K, Cretaceous; Pg, Paleogene; and Ng, Neogene

## Temperate vs. tropical

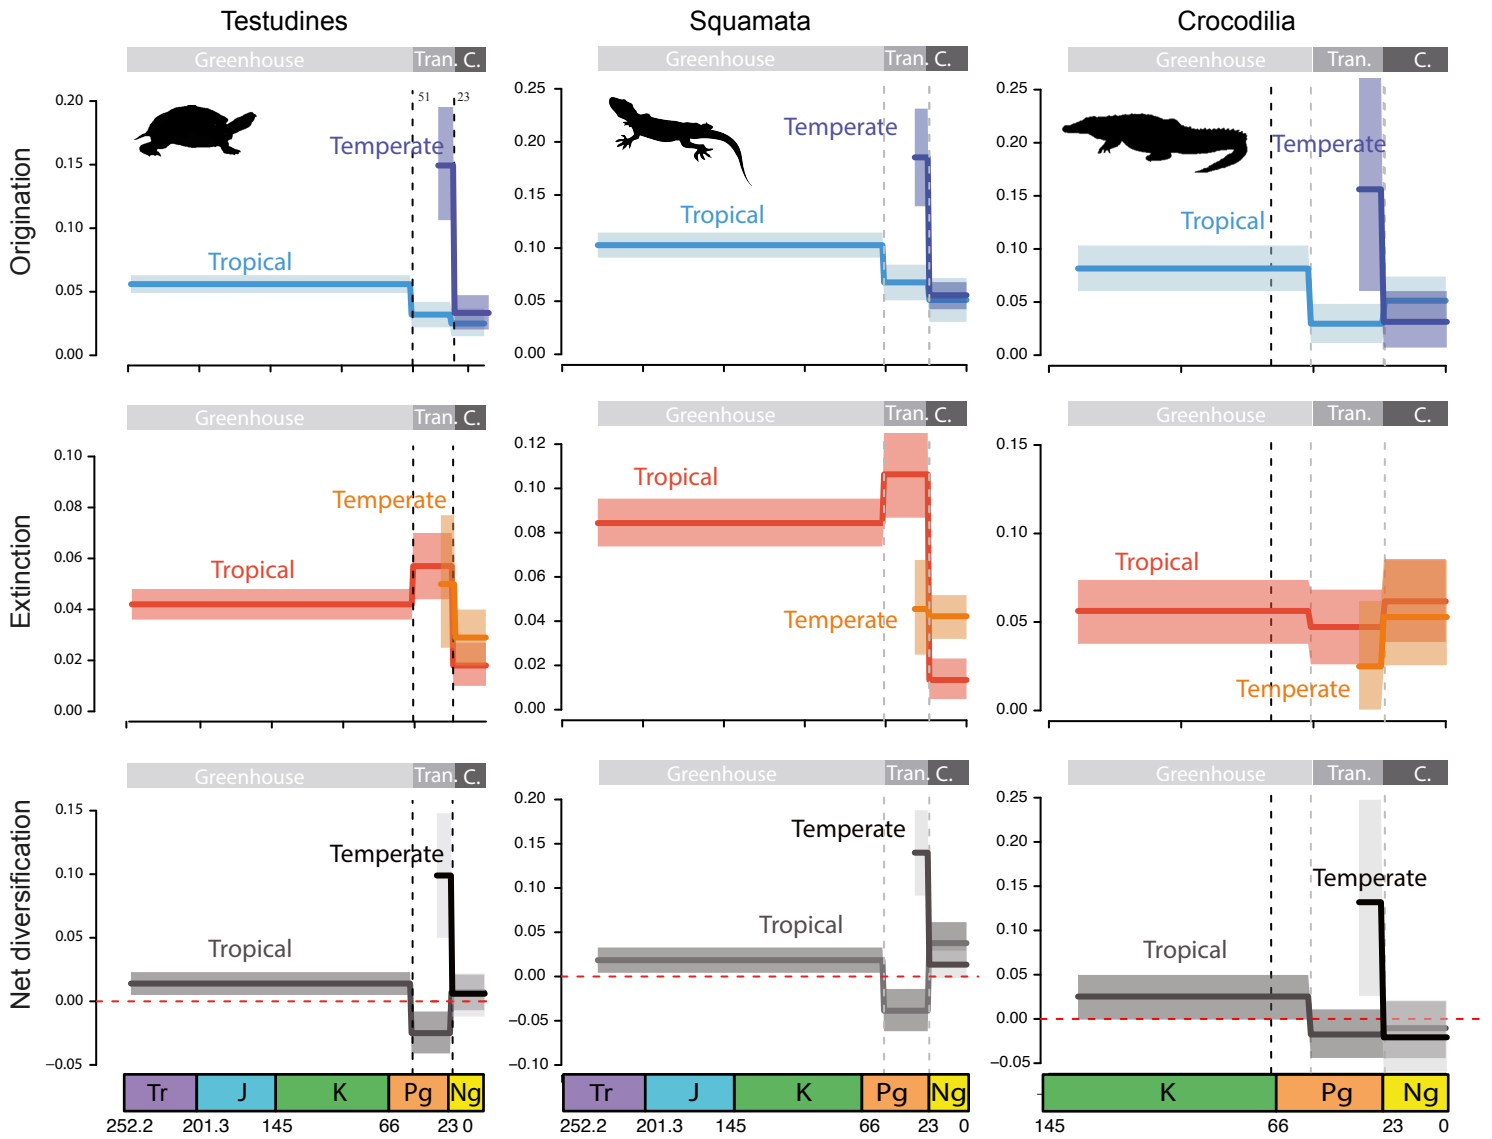

**Figure 5 | Global pattern of turtle, squamate and crocodile diversification across temperate and tropical climates, based on the fossil record.** Diversification dynamics are compared between fossils inhabiting under temperate and tropical macroclimates. Origination (blue) and extinction (red) rates were estimated using time bins as defined by the main climatic intervals since the Mesozoic (on the top, climatic periods are shown as follows: Greenhouse, Tran. = climatic transition, and C. = coldhouse). Solid lines indicate mean posterior rates, whereas the shaded areas show 95% credibility intervals. Net diversification rates (black) are the difference between origination and extinction. The vertical lines indicate the boundaries between climatic intervals. Tr, Triassic; J, Jurassic; K, Cretaceous; Pg, Paleogene; and Ng, Neogene.

251

252 ***Estimations of ancestral origins: did groups preferentially originate close to the equator?***

253 We tested the predictions of the AGE hypothesis further, by performing biogeographic  
254 analyses with the dispersal-extinction-cladogenesis (DEC) model<sup>75</sup> and dated phylogenies  
255 (see *Methods*). We first analyzed the data in an unconstrained DEC analysis in which all  
256 ranges covering three areas could be in an ancestral state. We inferred an equatorial  
257 distribution for the deepest nodes for the turtles and lepidosaurs, whence these lineages  
258 colonized the other regions (**Fig. 6a**, **Table 2**, Supplementary Fig. 10). Crocodile ancestors  
259 were found to have been widespread during the Cretaceous, with an early vicariant speciation  
260 event separating *Alligator* in the Holarctic from the other Alligatoridae genera in equatorial  
261 regions (Supplementary Fig. 11).

262 Our biogeographic estimates based exclusively on extant data conflict with the fossil  
263 record<sup>23,24,76</sup>. We overcame this bias by introducing information about the distribution of  
264 fossils into DEC, in the form of hard (HFC) and soft (SFC) geographic fossil constraints at  
265 specific nodes (see *Methods*; Supplementary Tables 7–9). The inclusion of fossil information  
266 yielded very different biogeographic histories for the three groups (**Table 2**; turtles: **Fig. 6b**,  
267 Supplementary Fig. 12; lepidosaurs: Supplementary Figs. 13, 14; and crocodiles:  
268 Supplementary Figs. 15, 16). Under the SFC model, turtles were found to have originated in  
269 the Northern Hemisphere (under the HFC model they were spread over both regions), whence  
270 lineages migrated towards the equator and southern regions (**Fig. 6b**, Supplementary Fig. 12).  
271 Most dispersal therefore occurred ‘*into the equator*’ (Supplementary Fig. 17,  
272 Supplementary Table 10). We also detected a larger number of geographic extinctions when  
273 fossil ranges were considered, predominantly for turtle lineages in the Holarctic (53 and 11  
274 lineages disappeared from this region under the HFC and SFC models, respectively) and in  
275 southern temperate regions (9 in the HFC model; Supplementary Fig. 17, Supplementary

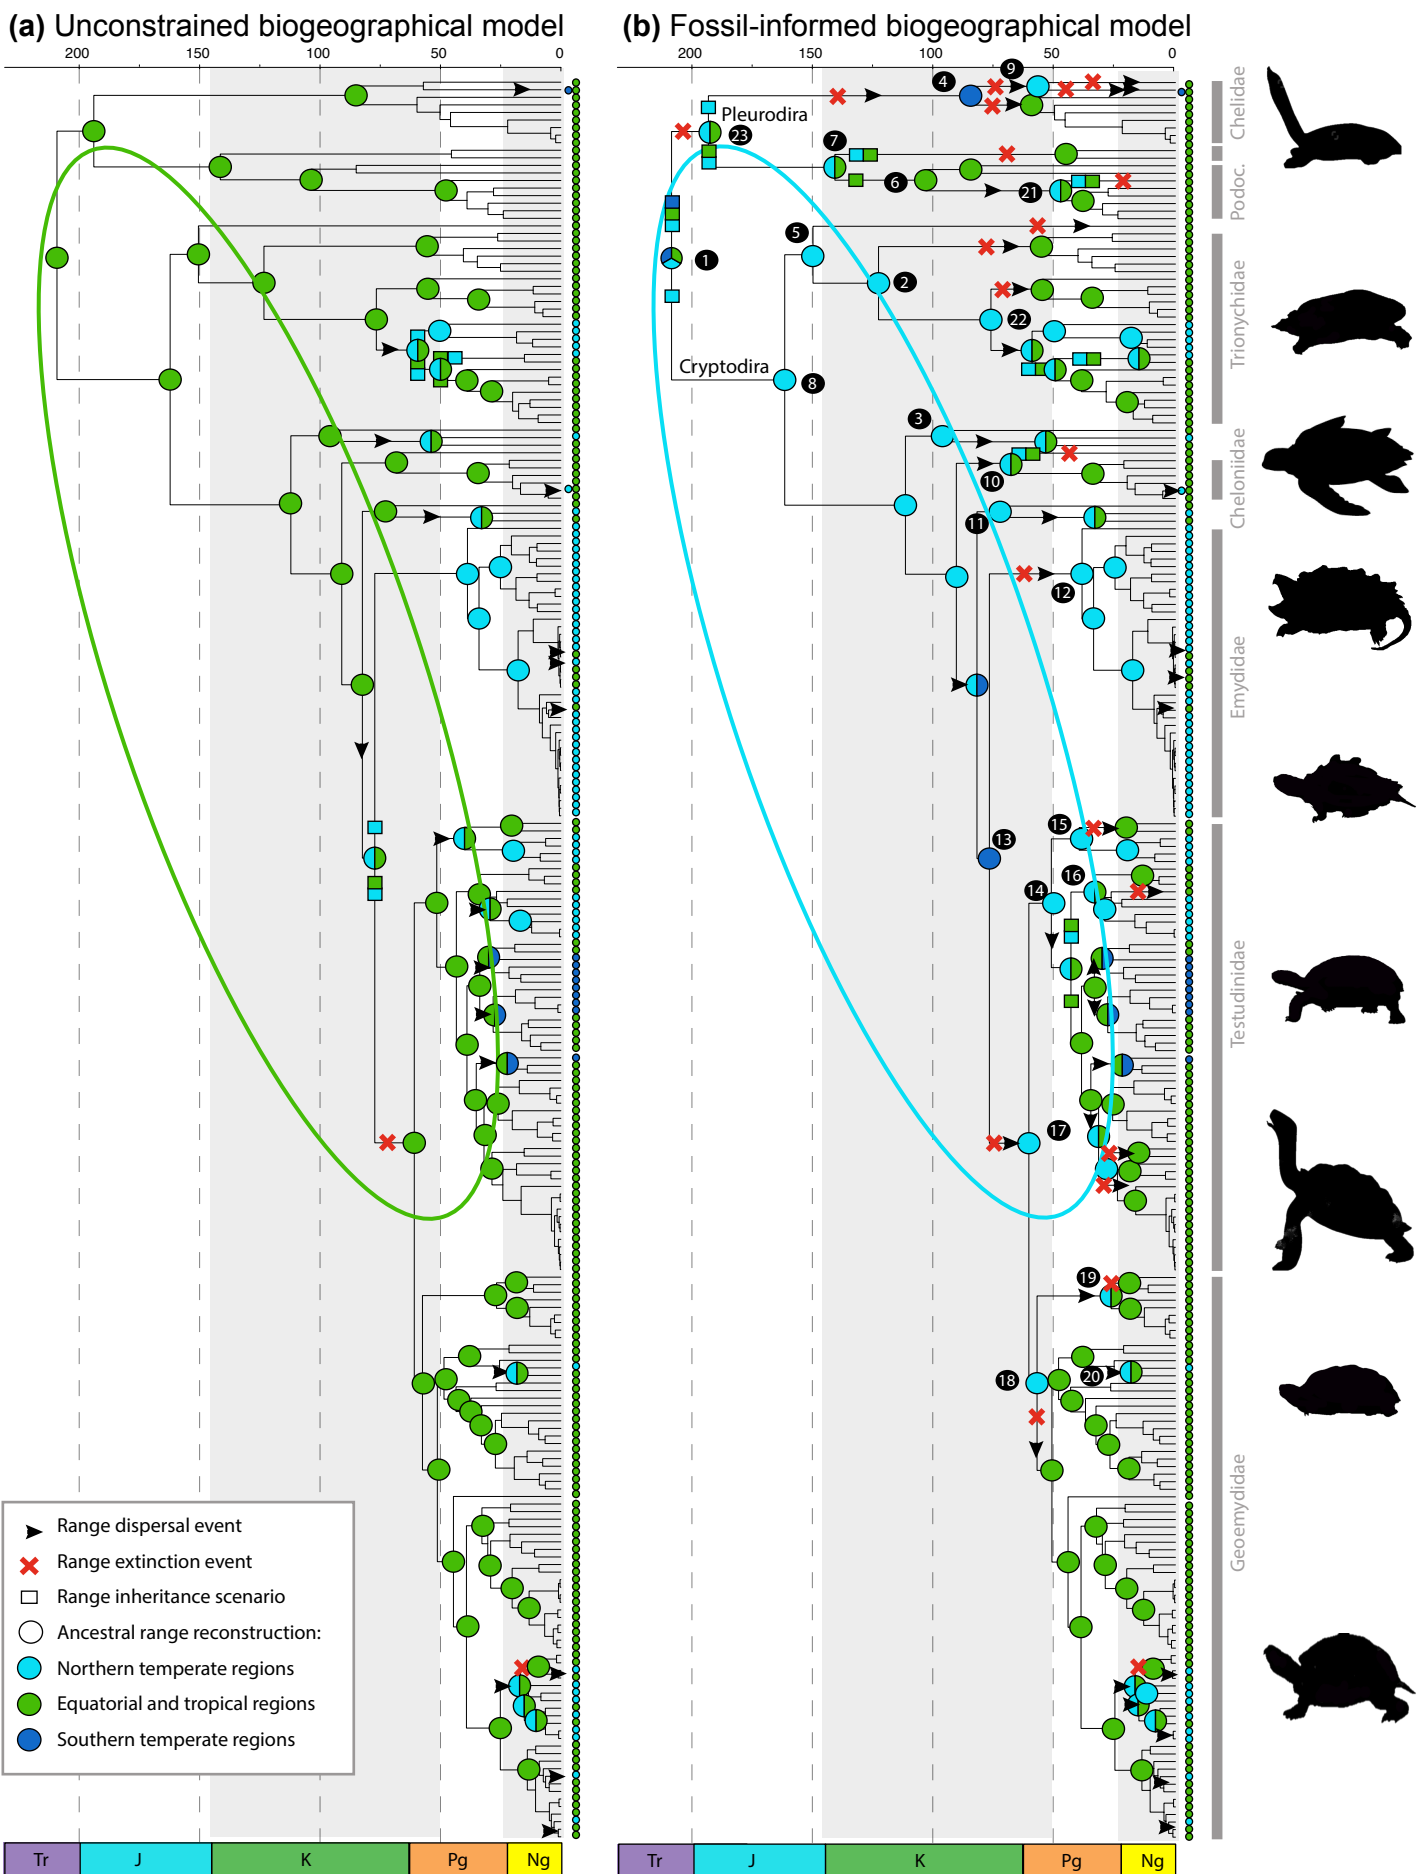

**Figure 6 | Biogeographic reconstruction of Testudines showing the effects of the incorporation of fossil information into biogeographic inference.** **a**, Biogeographic reconstruction inferred with DEC based on the distribution of extant taxa. **b**, Biogeographic reconstruction under the fossil-informed HFC (*hard fossil constraint*) model. Coloured circles at tips and nodes represent current and ancestral ranges, respectively, while squares represent range inheritance scenarios. Colours correspond with the discrete areas in the legend. Black circles indicate fossil range constraints included in the analysis, with numbers corresponding with taxa in Table Supplementary S7. The reconstruction under the *soft fossil constraint* (SFC, see text) model is presented in Supplementary Fig. 12.

276 Table 11). The same trend was observed when the number of extinction/dispersal events was  
277 controlled for the number of lineages currently distributed in each region (**Fig. 7**).

278       Lepidosaurs originated in both regions in both SFC and HFC analyses (Supplementary  
279 Figs. 13, 14). During the greenhouse period, dispersal ‘*into the equator*’ occurred at the same  
280 rate (or at a higher rate in the HFC model) than dispersal ‘*out of the equator*’, and dispersal  
281 ‘*out of the equator*’ prevailed thereafter (Supplementary Fig. 17, Supplementary Table 10).  
282 Estimated range extinction rates were high in this group under the unconstrained model, with  
283 30 lineages extirpated from the Holarctic, two from southern temperate regions and 152 from  
284 the equator (Supplementary Fig. 17, Supplementary Table 11). Under fossil-informed models,  
285 the number of Holarctic extinctions was higher (109 and 66 lineages in the HFC and SFC  
286 models, respectively), whereas the number of lineages extirpated from the equator was similar  
287 (144 and 109 in the HFC and SFC models, respectively; Supplementary Fig. 17). When the  
288 number of events was controlled for the actual number of lineages distributed in each region,  
289 the number of Holarctic extinctions and dispersals ‘*into the equator*’ increased dramatically,  
290 exceeding equatorial dispersal/extinctions (**Fig. 7**). For crocodiles, analyses including fossil  
291 ranges showed that all the early nodes were distributed in the Holarctic (Supplementary Figs.  
292 15, 16), and range extinctions were detected: four lineages disappeared from the Holarctic,  
293 three from southern temperate regions, and two from the equator (HFC model; Supplementary  
294 Fig. 17, Supplementary Tables 11, 12). Only two lineages disappeared from the Holarctic in  
295 the SFC model. The same trends were observed after controlling the number of events for the  
296 current number of lineages in each region (**Fig. 7**).

297

## 298 **Discussion**

### 299 ***Generation of the current LDG***

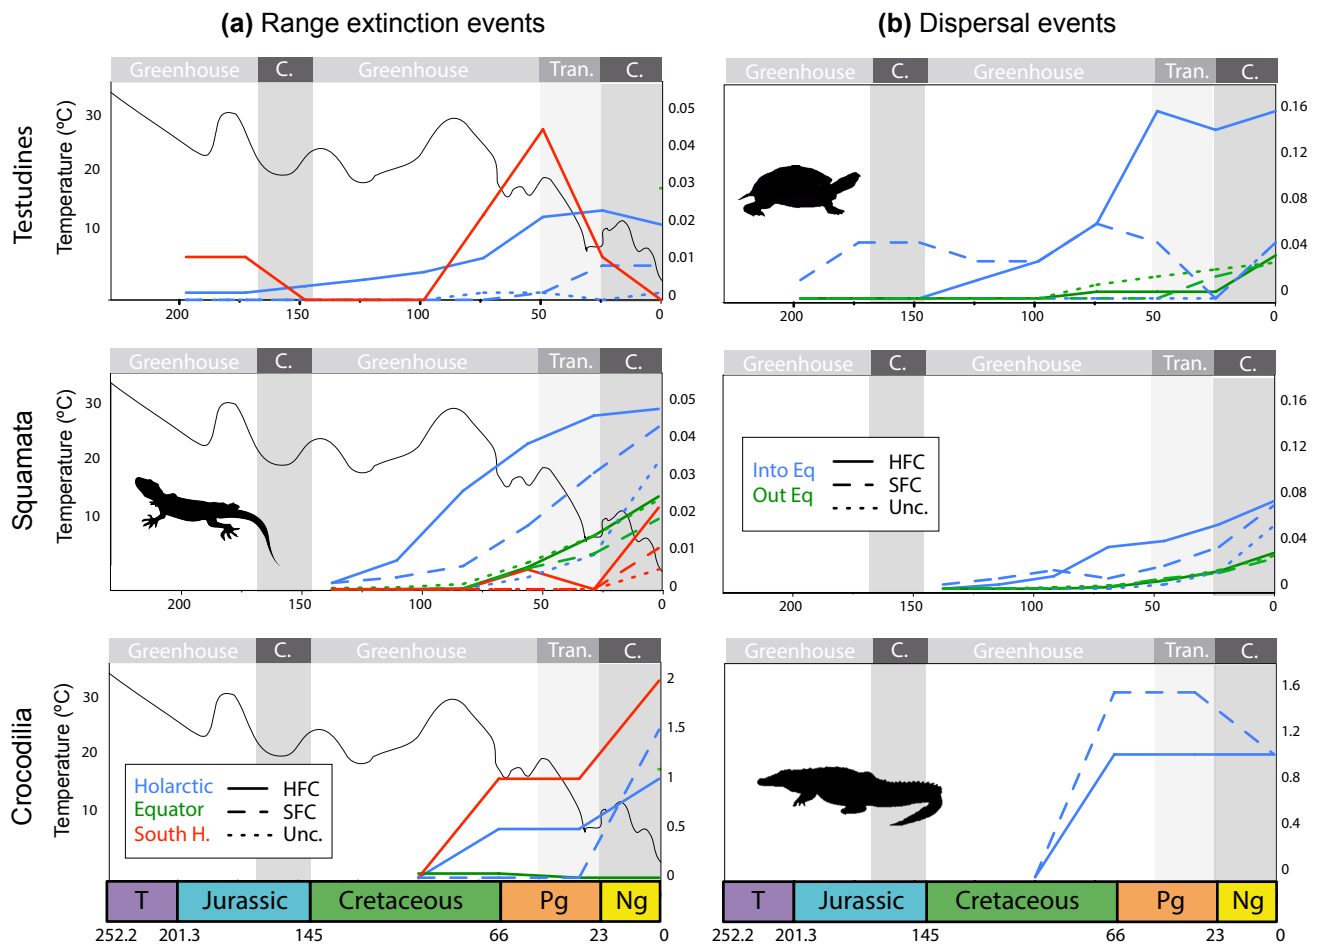

**Figure 7 | Estimated number of range-extinction and dispersal events through time.** Analyses were performed for Testudines, Squamata and Crocodiles under the *unconstrained model* (Unc.), based on present evidence only, and the fossil-based *hard* (HFC) and *soft fossil constraint* (SFC) biogeographic models. **a**, Inferred number of range extinction events through time and across regions relative to the number of lineages currently distributed in each region. The global mean temperature curve is modified from Zachos et al., (2008). **b**, Inferred number of dispersal events from the Holarctic into the equator (IntoEq) and out of the equatorial zone (OutEq), relative to the current number of lineages distributed in the Holarctic and equatorial zones, respectively. Abbreviations: Tr, Triassic; J, Jurassic; K, Cretaceous; Pg, Paleogene; and Ng, Neogene, Trans. = climatic transition, and C. = coldhouse.

300 Fossil investigations have shown that at certain times during the Phanerozoic, the LDG has  
301 weakened, flattened, or developed a palaeotemperate peak, with diversity at high latitudes  
302 being greater in some periods of the past than currently for many groups<sup>10,13</sup>. Hypotheses  
303 relating to ‘slow Holarctic diversity accumulation’, such as limited dispersal to the  
304 Holarctic<sup>31</sup>, high Holarctic turnover<sup>37,41,49</sup>, or high rates of equatorial diversification<sup>32–35,77</sup>,  
305 cannot themselves account for the formation of a flatten LDG, or the transition from higher to  
306 lower diversity in the Holarctic observed in many groups. Furthermore, although the  
307 processes shaping biodiversity vary over time and space, this has been largely overlooked in  
308 the context of the LDG, which has been generally explained in terms of the actions of time-  
309 constant process.

310 We account for temporal changes in the global distribution of biodiversity by  
311 proposing a scenario involving losses/gains of tropical diversity at high latitudes during  
312 transitional periods from warm to cool conditions. The AGE hypothesis captures components  
313 of previous studies<sup>10,31,35,50,65</sup> in the context of a time-variable LDG to disentangle the relative  
314 contributions of speciation, extinction and dispersal for each particular geological period in  
315 the formation of the LDG. Below, we evaluate the support of our analyses to the postulates of  
316 the time-variable AGE hypothesis (**Fig. 2; Table 1**):

317 **P1: Extinction exceeds speciation at high latitudes during cool transitions, *i.e.***  
318 **declining diversity ( $r_H < 0$ ).** Our diversification analyses based on extant species (time-  
319 constant and time-variable BiSSE analyses) do not support this postulate, suggesting instead  
320 higher levels of Holarctic diversification for turtles, and of equatorial diversification for  
321 lepidosaurs. By contrast, results for fossil-only (PyRate) diversification analyses were  
322 consistent with this prediction for turtles and crocodiles. We found that diversification rates of  
323 turtles and crocodiles decreased in all regions during the transition to colder climates, but the  
324 slowing of diversification was much stronger in the Holarctic than at the equator, with

325 extinction exceeding speciation in this region (**Fig. 3, 4**). This suggests that Holarctic  
326 diversity loss ( $r < 0$ ) during the Paleogene could explain the formation of a steep LDG for  
327 these groups. For lepidosaurs, **P1** is not supported by fossil data; diversity losses occurred  
328 during Cenozoic cooling in the equator but not at higher latitudes (**Fig. 4**). Diversity dynamics  
329 for the species distributed at the equator, however, may not be entirely reliable, due to the  
330 poverty of the equatorial dataset in terms of the number of fossil lineages and the small  
331 number of records per lineage (Supplementary Table 12). Uncertainties therefore remain on  
332 these estimates, which have wide credibility intervals, probably due to geographic biases in  
333 the fossil record<sup>78</sup>. Turnover rates were very high in the Holarctic during the transitional  
334 period, indicating that species did disappear from high latitudes, but that a new lepidosaur  
335 community replaced them. This result suggests the number of lepidosaur species may always  
336 have been unbalanced between regions. The high Holarctic turnover would contribute to the  
337 maintenance of this pattern, together with the inferred temporal increases in diversification at  
338 the equator (**Fig. 4**), as previously hypothesized<sup>41</sup>.

339 **P2: Higher ‘into the equator’ dispersal than ‘out of the equator’ dispersal**  
340 ( $d_{HE} > d_{EH}$ ) **during cool transitions.** The DEC biogeographic analyses based on extant  
341 species do not support this postulate but instead the ‘*tropical niche conservatism*’ hypothesis  
342 for turtles, with an equatorial origin and recent invasion of high-latitude regions, resulting in  
343 less time for lineages to diversify<sup>31</sup> (**Figs. 6, 7, Table 1, 2**). This result is consistent with the  
344 findings of recent investigations<sup>79,80</sup>. For lepidosaurs, they support the ‘*out of the tropics*’  
345 (**Fig. 7, Supplementary Figs. 1-3, 10**), and for crocodiles the diversification hypothesis, with  
346 higher origination rates close to the equator and no effect on dispersal (**Fig. 7, Table 2,**  
347 **Supplementary Fig. 11**). In contrast, time-constant and time-variable BiSSE analyses are  
348 consistent with **P2** and the ‘*into the equator*’ hypothesis to explain the LDG (Supplementary  
349 **Figs. 1a, 2a, 3a**), as so they are the results for fossil-informed DEC biogeographic analyses;



350 all groups are inferred to have had a widespread ancestral distribution that subsequently  
351 contracted towards the equator due to both higher levels of range extirpations at higher  
352 latitudes and ‘*into the equator*’ dispersals during Cenozoic cooling (**Figs. 6, 7**). This result is  
353 also in agreement with previous fossil investigations on turtles<sup>24,25,76</sup> and crocodiles<sup>23,44</sup>. For  
354 lepidosaurs, in absolute terms, more species migrated “*out of*” than “*into the equator*”  
355 (Supplementary Fig. 17), but the number of species in the equatorial region today is four  
356 times the number of lineages elsewhere. After controlling for the imbalance in species  
357 sampling in our tree, we found that a higher proportion of lepidosaur species lost their  
358 ancestral Holarctic distribution and emigrated ‘*into the equator*’<sup>41</sup> than the other way around  
359 (**Fig. 7**). Although the number of fossil constraints in the biogeographic analysis of  
360 lepidosaurs was relatively low given the size of the tree (30 Holarctic and equatorial fossils  
361 for 4161 nodes), these constraints significantly increased the absolute number of Holarctic  
362 range extinctions (from 30 to 109) and ‘*into the equator*’ dispersals (from 40 to 124) relative  
363 to estimates without such constraints (Supplementary Tables 10, 11). Meanwhile, the  
364 inclusion of fossil data did not alter the number of events estimated for equatorial taxa. This  
365 finding suggests that a deeper understanding of lepidosaur fossil taxonomy might facilitate the  
366 assignment of fossils on the tree, and the detection of additional high-latitude extinctions not  
367 detected here.

368         Unfortunately, the age of the taxa evaluated here prevents us for testing the predictions  
369 associated with the transition from coldhouse to greenhouse conditions (**P3-4**). Nonetheless,  
370 our fossil-based analyses show similar diversification rates in the Holarctic and equatorial  
371 regions during the greenhouse period of the Cretaceous-early Cenozoic for all groups  
372 (overlapping credibility intervals; **Fig. 4**; Supplementary Figs. 1-3, 4-9), consistent with the  
373 idea of the existence of a flattened LDG during this phase<sup>10</sup>. Similarly, the AGE hypothesis  
374 focuses essentially on the Northern Hemisphere, but diversity losses and dispersals ‘*into the*

375 *equator*' may have also occurred in the temperate regions of the Southern Hemisphere.  
376 Indeed, we found high rates of range extinctions in this region for all groups (**P2**; red lines on  
377 **Fig. 7**). Unfortunately, the scarce fossil record prevents any diversification estimates for this  
378 region (see *Methods*).

379 Overall, the general pattern that could be extracted from our study is that the AGE  
380 hypothesis was supported for crocodiles and turtles using fossil and fossil-informed  
381 phylogenetic investigations (**Table 1, 2; P1–P2** of AGE). However, if we rely only on  
382 analyses based on data for extant species using biogeographic and constant and time-variable  
383 BiSSE diversification models, this evolutionary scenario was poorly supported (although  
384 BiSSE analyses support **P2** of AGE). Support for the AGE hypothesis is mixed in  
385 lepidosaurs; on the one hand the detected Holarctic range contractions are in agreement with  
386 “higher Holarctic diversity loss” scenarios (**P2** of AGE), on the other hand, the evidence for  
387 high Holarctic turnover are more in line with previous “slower Holarctic diversity  
388 accumulation” hypotheses.

389

### 390 ***The timing and effect of the last greenhouse to coldhouse climatic transition***

391 Recent fossil investigations suggest that changes in the shape of the LDG have been  
392 associated with major climatic oscillations<sup>10,13</sup>. Accordingly, we hypothesized the  
393 impoverishment of the Holarctic resulted from the contraction of the tropical biome during  
394 the last greenhouse to coldhouse transition. But when this coldhouse transition took place?  
395 The transitional period to cold was here defined between 51 and 23 Ma, after the early Eocene  
396 Climatic Optimum (EECO), based on paleontological evidence showing that paratropical  
397 conditions and the associated warm-adapted taxa disappeared from high latitudes between the  
398 mid-late Eocene and the Neogene<sup>59,61,62</sup>. Our diversification results with time intervals defined  
399 by the main climatic periods are consistent with these observations, and detect Holarctic

400 diversity loss during the late Paleogene. We cannot exclude, however, that diversity losses at  
401 high latitudes occurred since the Cretaceous, as suggested by our fossil-based diversification  
402 analyses with time intervals defined by the main geological periods (Supplementary Figs. 4,  
403 6, 8) and by our fossil-based biogeographic analyses suggesting the prevalence of ‘*into the*  
404 *equator*’ dispersals since the Cretaceous (**Fig. 7**, Supplementary Table 11). These findings  
405 could suggest that other processes different to climate change mediated the extinction and  
406 range contraction of Holarctic lineages in the Cretaceous, or alternatively, that a transition  
407 phase to cold started before the relatively short interval considered here. Some studies  
408 consider the EECO only represented a transient temperature peak within an otherwise cooling  
409 trend that started in the Cretaceous<sup>64,81</sup>. This trend was intensified by the Cretaceous-  
410 Paleogene (K-Pg) mass extinction, and the drop in temperatures caused by the impact-  
411 associated winter<sup>82,83</sup>. In our study, lineage extinctions, range extinctions and southward  
412 dispersals increased between the K-Pg and Neogene (**Fig. 4, 7**), suggesting an additive effect  
413 of K-Pg and Neogene cooling on depopulation of the Holarctic.

414 The ancestors of turtles, lepidosaurs and crocodiles were adapted to tropical conditions  
415 during the Late Cretaceous<sup>44,84</sup>. Our results indicate that extinction events were not random,  
416 instead preferentially affecting taxa living in tropical-like climates at high latitudes<sup>48</sup> (**Figs. 4,**  
417 **5**). This suggests that many species adapted to warm conditions living in the Holarctic were  
418 unable to adapt to the new temperate regimes and either went extinct or escaped extinction by  
419 contracting their ranges in a southerly direction (**Fig. 7**). Meanwhile, we found that the  
420 diversification rates of turtles, crocodiles and lepidosaurs living in temperate climatic  
421 conditions were significantly higher than those of tropical-adapted taxa living in Holarctic and  
422 equatorial regions after the transition to temperate climates in the late Eocene (**Fig. 5, Table**  
423 **2**). The new temperate habitats could have constituted an opportunity for diversification  
424 because they increased geographic ranges and ecological niches<sup>34</sup>, and may have driven an

425 inverse LDG for some groups<sup>39,68</sup>. Several radiations following the appearance of the  
426 temperate biome have been identified in other groups of organisms, such as plants<sup>85,86</sup>,  
427 mammals<sup>87,88</sup> or insects<sup>89</sup>. After this period, speciation decreased dramatically in the  
428 temperate lineages of our focal groups, possibly due to the effect of the Pleistocene  
429 glaciations, and no difference in diversification between tropical and temperate lineages is  
430 currently evident (**Fig. 5**). In summary, our study suggests that differences in species richness  
431 between geographic regions may be explained by differences in diversification and dispersal  
432 rates. Differences in species richness between ecological types may be explained by the  
433 longer time available for tropical-adapted clades to diversify in tropical areas<sup>90</sup> rather than  
434 higher rate of speciation under warm tropical environments, as previously postulated<sup>91</sup>.

435

#### 436 *Reconciling fossil and phylogenetic evidence*

437 Our results unequivocally demonstrate that the inclusion of fossils in macroevolutionary  
438 studies makes it possible to detect signals of ancient high-latitude extinctions and range  
439 extirpations (**Figs. 4-7**), otherwise hardly detectable with analyses based exclusively on  
440 present-day data. This conflict between extant and fossil evidence may extend beyond our  
441 study, pervading the LDG literature. High extinction rates have occasionally been inferred in  
442 tropical lineages<sup>67,92-94</sup>, with hypotheses relating to extinction focused on temperate taxa and  
443 recent time scales, such as the effects of recent Pleistocene glaciations, for example<sup>33,37,41,42</sup>.  
444 In reported cases of extinction, origination rates were also found to be elevated in high-  
445 latitude groups (high turnover)<sup>33,37-39,41,50</sup>, while diversity losses ( $r < 0$ ) have to our  
446 knowledge never been inferred in phylogenetic studies of the LDG (with the exception of the  
447 recent Pulido-Santacruz & Weir (2016) study using time constant BiSSE models, but see  
448 below). On the other hand, ancient tropical extinction at high latitudes is supported by fossil  
449 studies on various taxonomic groups<sup>15,16,28,53-56</sup>.

450           The last decade has seen many efforts to reconcile fossil and phylogenetic evidence.  
451 Birth-death diversification models have been developed to detect negative diversification  
452 rates on reconstructed phylogenies, or total-evidence trees<sup>95–97</sup>. Still, their use in the literature  
453 is limited and these models are difficult to implement in a trait evolution context, such as in  
454 the study of the LDG. LDG studies are often based on state-dependent speciation and  
455 extinction models<sup>35,38,40,41,49,50</sup>. These models are designed to test differential diversification  
456 and asymmetric transition scenarios, such as that suggested here, but LDG studies often  
457 assume that diversification parameters remain constant over time. If the evolutionary  
458 processes shaping the LDG have varied across latitudes and time, then time-constant models  
459 are not appropriate for testing more complex scenarios underlying the LDG. Moreover, the  
460 potential of time-constant models for detecting negative diversification rates is questionable,  
461 since inferring negative diversification for the entire history of lineages conflicts with the fact  
462 that these groups are still extant. Testing our hypothesis thus requires the implementation of  
463 time-variable models. When applied to the study of diversity patterns, these models have  
464 revealed marked extinction signatures in ancestral tropical plant clades<sup>98</sup>. The incorporation of  
465 time-shifts into our BiSSE analyses improves but not completely reconciles the fossil  
466 evidence with extant diversity. Identifying the causes of this problem and finding solutions  
467 are beyond the scope of this study, but this artifact highlights the importance of fossils in  
468 macroevolutionary inferences<sup>99</sup>. Fossil records remain incomplete, but they nevertheless  
469 provide the only direct evidence of the diversity that existed in the past. By contrast to  
470 molecular phylogenies, the incompleteness of the fossil record has a less problematic effect  
471 on the estimation of speciation and extinction rates, because removing a random set of taxa  
472 does not affect the observed occurrences of other lineages<sup>74</sup>. Indeed, simulations have shown  
473 that PyRate correctly estimates the dynamics of speciation and extinction rates under low  
474 levels of preservation or severely incomplete taxon sampling.

475

## 476 **Conclusion**

477 After decades of research, the processes shaping the LDG remain among the most hotly  
478 debated topics in ecology and evolutionary biology. We propose here the AGE hypothesis,  
479 which explains the origin of the current LDG through the changes in global diversification  
480 and dispersal dynamics imposed by large-scale climatic transitions. Our analyses for turtles  
481 and crocodylians indicated that the processes shaping the LDG have changed over time, the  
482 current form of this gradient being the result of ancient high-latitude tropical diversity loss  
483 and range contractions as a consequence of the retraction of the tropical biome and due to  
484 climate cooling. The AGE hypothesis might account for the LDG of tropical-adapted groups  
485 that were once diverse at high latitudes, but might not be fully applicable to all organisms  
486 currently displaying a LDG, as shown here for lepidosaurs.

487

## 488 **Methods**

489 ***Time-calibrated phylogenies and the fossil record.*** We compared the predictions of the AGE  
490 hypothesis with the LDG of three vertebrate groups: turtles (order Testudines), crocodiles  
491 (order Crocodylia), and scaled lizards (order Lepidosauria). A time-calibrated phylogeny for  
492 each group was obtained from published data. For turtles, we used the phylogeny of Jaffe *et*  
493 *al.* (2011), including 233 species. We preferred this phylogeny over other more recent and  
494 slightly better sampled trees<sup>101</sup> because the divergence time estimates of Jaffe *et al.* (2011) are  
495 more consistent with recent estimates based on genomic datasets<sup>79,102</sup>. For lepidosaurs, we  
496 retrieved the most comprehensive dated tree available, including 4161 species<sup>41</sup>, and a  
497 complete phylogeny was obtained for crocodiles<sup>103</sup>.

498 Fossil occurrences were downloaded from the *Paleobiology Database*  
499 (<https://paleobiodb.org/#/>, last accessed October 25<sup>th</sup> 2017). We reduced potential biases in

500 the taxonomic assignation of turtle, crocodile and lepidosaur fossils, by compiling occurrence  
501 data at the genus level. The fossil datasets were cleaned by checking for synonymies between  
502 taxa and for assignment to a particular genus or family on the basis of published results  
503 (Supplementary Table 4–6).

504

505 ***Estimation of origination and extinction rates with phylogenies.*** We investigated possible  
506 differences between Holarctic and equatorial regions, by combining the turtle and lepidosaur  
507 phylogenies with distributional data (Supplementary Tables 1, 2) to fit trait-dependent  
508 diversification models in BiSSE<sup>70</sup>. We accounted for incomplete taxon sampling in the form  
509 of trait-specific global sampling fraction of extant species<sup>104</sup>.

510 We ensured comparability with previous LDG studies, by initially using a constant-  
511 rate trait-dependent diversification model. The constant-rate BiSSE model has six parameters:  
512 two speciation rates (without range shift, or *in situ* speciation), one associated with the  
513 Holarctic (hereafter ‘H’,  $\lambda_H$ ) and the other with other equatorial and subtropical regions  
514 (hereafter ‘equator’ or ‘E’,  $\lambda_E$ ), two extinction rates associated with the Holarctic ( $\mu_H$ ) and the  
515 equator ( $\mu_E$ ), and two transition rates (dispersal or range shift), one for the Holarctic to  
516 equator direction ( $q_{H-E}$ ), and the other for the equator to Holarctic direction ( $q_{E-H}$ ).

517 We then assessed the effect of species distribution on diversification, allowing for rate  
518 changes at specific time points. This approach is associated with a lower bias than the use of  
519 constant rates. We used the time-dependent BiSSE (BiSSE.td) model, in which speciation,  
520 extinction, and dispersal rates are allowed to vary between regions and to change after the  
521 shift times. We introduced two shift times to model different diversification dynamics  
522 between greenhouse, transitional, and coldhouse periods. We assumed that a global warm  
523 tropical-like climate dominated the world from the origin of the clades until 51 Ma  
524 (corresponding to the temperature peak in the Cenozoic). Thereafter, the climate

525 progressively cooled until 23 Ma (the transitional period), when the climate definitively  
526 shifted to a temperate-like biome in the Holarctic<sup>61,62,64</sup>. The shift times at 51 Ma and at 23  
527 Ma are initial values that are re-estimated by the model during the likelihood calculation. The  
528 climatic transition in the Cenozoic may have different temporal boundaries, with potential  
529 effects on the results. We thus applied the same model but with different combinations of shift  
530 times (we tested 51/66 Ma and 34/23 Ma for the upper and lower bounds of the climatic  
531 transition).

532 Analyses were performed with the R package *diversitree* 0.9-7<sup>71</sup>, using the *make.bisse*  
533 function to construct likelihood functions for each model from the data, and the functions  
534 *constrain* and *find.mle* to apply different diversification scenarios. Finally, we used a Markov  
535 Chain Monte Carlo (MCMC) approach to investigate the credibility intervals of the parameter  
536 estimates. Following previous recommendations<sup>71</sup>, we used an exponential prior  $1/(2r)$  and  
537 initiated the chain with the parameters obtained by maximum likelihood methods. We ran  
538 10,000 MCMC steps, with a burn-in of 10%.

539  
540 ***Estimation of origination and extinction rates with fossils.*** We also used fossil data to  
541 estimate diversification rates over time. We analyzed the three fossil records, using a  
542 Bayesian model for simultaneous inference of the temporal dynamics of origination and  
543 extinction, and of preservation rates<sup>74</sup>. This approach, implemented in PyRate<sup>105</sup>, uses fossil  
544 occurrences that can be assigned to a taxon, in this case fossil genera. The preservation  
545 process is used to infer the individual origination and extinction times of each taxon from all  
546 fossil occurrences and an estimated preservation rate; it is expressed as expected occurrences  
547 per taxon per million years.

548 We followed a birth-death shift approach<sup>106</sup>, which focuses on the variation of  
549 origination and extinction at a global scale and over large temporal ranges. We used a



550 homogeneous Poisson process of preservation (-mHPP option). We also accounted for the  
551 variation of preservation rates across taxa, using a Gamma model with gamma-distributed rate  
552 heterogeneity (-mG option). We used four rate categories to discretize the gamma  
553 distribution, to allow for a greater variability of preservation rates across taxa.

554         Given the large number of occurrences analyzed and the vast timescale considered, we  
555 dissected the birth–death process into time intervals, and estimated origination and extinction  
556 rates within these intervals. In one set of analyses we defined the time intervals using the  
557 geological epochs of the stratigraphic timescale<sup>107</sup> (Supplementary Figs. 4, 6, 8). In another  
558 set of analyses, we defined the intervals according to the different climatic periods  
559 characterizing the Cenozoic (Supplementary Figs. 5, 7, 9), as discussed above: the greenhouse  
560 world (Cretaceous), the climatic transition (Paleogene), and the coldhouse world (Neogene  
561 until the present). We adopted this solution as an alternative to the algorithms implemented in  
562 the original PyRate software for joint estimation of the number of rate shifts and the times at  
563 which origination and extinction shift<sup>74</sup>. The estimation of origination and extinction rates  
564 within fixed time intervals improved the mixing of the MCMC and made it possible to obtain  
565 an overview of the general trends in rate variation over a long timescale<sup>106</sup>. Both the  
566 preservation and birth–death processes were modeled in continuous time but without being  
567 based on boundary crossings. Thus, the origination and extinction rates were measured as the  
568 expected number of origination and extinction events per lineage per million years. One  
569 potential problem when fixing the number of rate shifts *a priori* is over-parameterization. We  
570 overcame this problem by assuming that the rates of origination and extinction belonged to  
571 two families of parameters following a common prior distribution, with parameters estimated  
572 from the data with hyper-priors<sup>108</sup>.

573         We ran PyRate for 10 million MCMC generations on each of the 10 randomly  
574 replicated datasets. We monitored chain mixing and effective sample sizes by examining the

575 log files in Tracer 1.6<sup>109</sup>. After excluding the first 20% of the samples as a burn-in, we  
576 combined the posterior estimates of the origination and extinction rates across all replicates to  
577 generate plots of the change in rate over time. The rates of two adjacent intervals were  
578 considered significantly different if the mean of one lay outside the 95% credibility interval of  
579 the other, and vice versa. We looked at the marginal posterior distributions of origination and  
580 extinction rates through the evolutionary history of the three groups and assessed the effect of  
581 different environments.

582 In the context of the LDG, we performed additional analyses with different subsets of  
583 fossils, to separate the speciation and extinction signals of different geographic regions  
584 (equator or Holarctic) and ecological conditions (temperate or tropical). For example, for  
585 turtles, we split the global fossil dataset into four subsets: one for the fossil genera occurring  
586 at the equator (429 occurrences), one for the fossils occurring in the Holarctic (3568  
587 occurrences), one for the fossil genera considered to be adapted to temperate conditions (993  
588 occurrences), and one for the fossils considered to be adapted to tropical conditions (2996  
589 occurrences). We excluded the few fossil occurrences for the southern regions of the South  
590 Hemisphere (about 180) only in subset analyses, as they were poorly represented in our  
591 dataset. Note that a given fossil can be present in both the ‘Holarctic’ and ‘tropical’ datasets.  
592 We encoded tropical/temperate preferences by considering macroconditions in the Holarctic  
593 to be paratropical until the end of the Eocene, as previously reported<sup>61,62</sup> (and references  
594 therein). We also assumed that taxa inhabiting the warm Holarctic were adapted to tropical-  
595 like conditions (*i.e.* a high global temperature, indicating probable adaptation to tropical  
596 climates). This is, of course, an oversimplification that may introduce bias into the analysis,  
597 but general patterns may nevertheless emerge from such analyses<sup>110</sup>. For turtles, this  
598 assumption is supported by a recent study modeling the climatic niche of this group during  
599 the Late Cretaceous, which found that the Holarctic ancestors of turtles were adapted to

600 tropical conditions<sup>84</sup>. After the late Eocene, we categorized each species as living in the  
601 temperate biome or the tropical biome, according to the threshold latitudes defining the  
602 tropics (23.4°N and 23.4°S) suggested in a previous study<sup>33</sup>. This delineation is also  
603 consistent overall with the Köppen climate classification. With these datasets, we reproduced  
604 the same PyRate analyses as for the whole dataset (see above). In general, the fossil datasets  
605 included mostly Holarctic fossils, with a smaller number of occurrences for the equator.  
606 Caution is therefore required when drawing conclusions from the equatorial datasets.

607

608 ***Inferring ancestral geographic distribution with phylogenies and fossils.*** We performed  
609 biogeographic analyses with the parametric likelihood method DEC<sup>75</sup> using the fast C++  
610 version<sup>111</sup> (<https://github.com/rhr/lagrange-cpp>). Turtle, lepidosaur, and crocodile species  
611 distributions were obtained from online databases ([www.iucnredlist.org](http://www.iucnredlist.org) and [www.reptile-database.org](http://www.reptile-database.org)). We chose 23.4°N and 23.4°S as the threshold latitudes defining the tropics, and  
612 categorized each species as living in the Holarctic, in the southern temperate regions, or in the  
613 equatorial tropics and subtropical regions. We considered that all ranges comprising three  
614 areas could be considered an ancestral state (*maxareas* =3).

616 We set up three different DEC analyses. We first ran DEC with no particular  
617 constraints, using only the distribution of extant species. We then performed DEC analyses  
618 including fossil information in the form of ‘fossil constraints’ at certain nodes, according to  
619 the range of distribution of fossil occurrences assigned to a particular taxon during the  
620 relevant time frame. For example the crown age of Carettochelyidae (Testudines) dates back  
621 to the Late Jurassic (150 Ma, *node 5*, **Fig. 3**; Supplementary Table 7), and we set a constraint  
622 on this node reflecting the distribution of all the Late Jurassic fossils attributed to  
623 Carettochelyidae. Similarly, for the origin of turtles (210 Ma, *node 1*), distribution constraints  
624 represent the range of Late Triassic fossils assigned to turtles. For the crown of Trionychidae,

625 in the Early Cretaceous (123 Ma, *node 2*), the early fossils assigned to the clade were used to  
626 constrain the geographic origin of Trionychidae. In total, we implemented 23 fossil  
627 constraints for turtles (Supplementary Table 7), 30 fossil constraints for lepidosaurs  
628 (Supplementary Table 8), and 8 for crocodiles (Supplementary Table 9).

629 We included the fossil distribution in two different approaches: (*i*) a soft (SFC), and  
630 (*ii*) hard fossil constraints (HFC). For the SFC approach, fossil data were incorporated into the  
631 anagenetic component of the likelihood framework. The direct impact of a given fossil is  
632 limited to the particular branch to which it has been assigned, although it may indirectly  
633 influence other branches. The inclusion of a fossil conditions the estimated geographic-  
634 transition probability matrix for that branch by imposing a spatiotemporal constraint on the  
635 simulation process. Only the simulations resulting in a geographic range including the area of  
636 fossil occurrence contribute to the geographic-range transition probability matrix for the  
637 branch concerned; simulations not meeting this constraint are discarded<sup>112</sup>. For SFC, we used  
638 the command '*fossil*' in DEC. We consider this to be a 'soft' constraint, because other areas  
639 different from that in which the fossil was found could be included in the ancestral states. In  
640 some cases, in which today's diversity is not representative of past diversity (*e.g.* due to  
641 extreme levels of extinction), the SFC model may still overlook known fossil information. We  
642 therefore also implemented an HFC model in which the estimation of ancestral areas was  
643 fixed to the location of fossils. This was achieved with existing functions in the C++ version  
644 of Lagrange, using the command '*fixnode*'. By fixing nodes to the distribution area of fossils,  
645 we assume fossil occurrences reflect the distribution of the ancestors, *i.e.* that the fossil record  
646 is complete. This is a strong assumption, but it makes it possible to recover all fossil ranges in  
647 the ancestral estimations. The real scenario probably lies somewhere between the SFC and  
648 HFC inferences.

649 We then compared the timing and number of range extinction and dispersal events  
650 inferred with the three different biogeographic analyses. In DEC, range-subdivision  
651 (inheritance) scenarios (vicariance, duplication and peripatric isolation) occur at cladogenetic  
652 events, whereas extinction (range contraction) and dispersal (range expansion) are modeled as  
653 stochastic processes occurring along the branches of the tree<sup>113</sup>. As the probability of any  
654 extinction/dispersal event is constant along the entire length of the branch, we estimate the  
655 periods at which range extinction and dispersal occurred by dividing the phylogeny into  
656 intervals of 25 million years and calculating the number of branches for which  
657 extinction/dispersal was inferred crossing a particular time interval (the same branch could  
658 cross two continuous intervals).

659

#### 660 **Acknowledgements**

661 The authors are very grateful to Arne Mooers, Joaquin Hortal, Juan Arroyo, and anonymous  
662 reviewers for comments and suggestions that greatly improved the study. Previous versions of  
663 the manuscript benefited from the comments of Gary Mittlebach, Emmanuelle Joussetin and  
664 Jonathan Rolland. Financial support was provided by a Marie-Curie FP7-COFUND  
665 (AgreenSkills fellowship-26719) grant to A.S.M. and a Marie Curie FP7-IOF (project 627684  
666 BIOMME) grant to F.L.C. This work benefited from an “Investissements d’Avenir” grant  
667 managed by the “Agence Nationale de la Recherche” (CEBA, ref. ANR-10-LABX-25-01).

668

#### 669 **Author contributions**

670 Both authors designed the study, analyzed the data and wrote the manuscript.

671

#### 672 **Competing interests**

673 The authors have no competing financial interests to declare.

674  
675  
676  
677  
678  
679  
680  
681  
682  
683  
684  
685  
686  
687  
688  
689  
690  
691  
692  
693  
694  
695  
696  
697  
698  
699

**Reference list**

1. Hillebrand, H. On the generality of the latitudinal diversity gradient. *Am. Nat.* **163**, 192–211 (2004).
2. Fuhrman, J. A. *et al.* A latitudinal diversity gradient in planktonic marine bacteria. *Proc. Natl. Acad. Sci.* **105**, 7774–7778 (2008).
3. Novotny, V. *et al.* Why Are There So Many Species of Herbivorous Insects in Tropical Rainforests? *Science* **313**, 1115–1118 (2006).
4. Jenkins, C. N., Pimm, S. L. & Joppa, L. N. Global patterns of terrestrial vertebrate diversity and conservation. *Proc. Natl. Acad. Sci.* **110**, E2602–E2610 (2013).
5. Kreft, H. & Jetz, W. Global patterns and determinants of vascular plant diversity. *Proc. Natl. Acad. Sci.* **104**, 5925–5930 (2007).
6. Willig, M. R., Kaufman, D. M. & Stevens, R. D. Latitudinal gradients of biodiversity: pattern, process, scale, and synthesis. *Annu. Rev. Ecol. Evol. Syst.* **34**, 273–309 (2003).
7. Mittelbach, G. G. *et al.* Evolution and the latitudinal diversity gradient: speciation, extinction and biogeography. *Ecol. Lett.* **10**, 315–331 (2007).
8. Crame, J. A. Taxonomic diversity gradients through geological time. *Divers. Distrib.* **7**, 175–189 (2001).
9. Alroy, J. *et al.* Phanerozoic trends in the global diversity of marine invertebrates. *Science* **321**, 97–100 (2008).
10. Mannion, P. D., Upchurch, P., Benson, R. B., Goswami, A. & Trends Ecol, E. The latitudinal biodiversity gradient through deep time. *Trends Ecol. Evol.* **29**, 42–50 (2014).
11. Mannion, P. D. *et al.* A temperate palaeodiversity peak in Mesozoic dinosaurs and evidence for Late Cretaceous geographical partitioning. *Glob. Ecol. Biogeogr.* **21**, 898–908 (2012).

- 700 12. Rose, P. J., Fox, D. L., Marcot, J. & Badgley, C. Flat latitudinal gradient in Paleocene  
701 mammal richness suggests decoupling of climate and biodiversity. *Geology* **39**, 163–  
702 166 (2011).
- 703 13. Marcot, J. D., Fox, D. L. & Niebuhr, S. R. Late Cenozoic onset of the latitudinal  
704 diversity gradient of North American mammals. *Proc. Natl. Acad. Sci.* **113**, 7189–7194  
705 (2016).
- 706 14. Brocklehurst, N., Day, M. O., Rubidge, B. S. & Fröbisch, J. Olson’s Extinction and the  
707 latitudinal biodiversity gradient of tetrapods in the Permian. *Proc. R. Soc. B Biol. Sci.*  
708 **284**, 20170231 (2017).
- 709 15. Archibald, S. B., Greenwood, D. R. & Mathewes, R. W. Seasonality, montane beta  
710 diversity, and Eocene insects: Testing Janzen’s dispersal hypothesis in an equable  
711 world. *Palaeogeogr. Palaeoclimatol. Palaeoecol.* **371**, 1–8 (2013).
- 712 16. Archibald, S. B., Bossert, W. H., Greenwood, D. R. & Farrell, B. D. Seasonality, the  
713 latitudinal gradient of diversity, and Eocene insects. *Paleobiology* **36**, 374–398 (2010).
- 714 17. Labandeira, C. C. & Currano, E. D. The fossil record of plant-insect dynamics. *Annu.*  
715 *Rev. Earth Planet. Sci.* **41**, 287–311 (2013).
- 716 18. Powell, M. G. Latitudinal diversity gradients for brachiopod genera during late  
717 Palaeozoic time: links between climate, biogeography and evolutionary rates. *Glob.*  
718 *Ecol. Biogeogr.* **16**, 519–528 (2007).
- 719 19. Powell, M. G., Beresford, V. P. & Colaianne, B. A. The latitudinal position of peak  
720 marine diversity in living and fossil biotas. *J. Biogeogr.* **39**, 1687–1694 (2012).
- 721 20. Krug, A. Z. & Patzkowsky, M. E. Geographic variation in turnover and recovery from  
722 the Late Ordovician mass extinction. *Paleobiology* **33**, 435–454 (2007).
- 723 21. Crame, J. A. Evolution of taxonomic diversity gradients in the marine realm: evidence  
724 from the composition of recent bivalve faunas. *Paleobiology* **26**, 188–214 (2000).

- 725 22. Leprieur, F. *et al.* Plate tectonics drive tropical reef biodiversity dynamics. *Nat.*  
726 *Commun.* **7**, 11461 (2016).
- 727 23. Mannion, P. D. *et al.* Climate constrains the evolutionary history and biodiversity of  
728 crocodylians. *Nat. Commun.* **6**, 8438 (2015).
- 729 24. Nicholson, D. B., Holroyd, P. A., Valdes, P. & Barrett, P. M. Latitudinal diversity  
730 gradients in mesozoic non-marine turtles. *R. Soc. Open Sci.* **3**, 160581 (2016).
- 731 25. Nicholson, D. B., Holroyd, P. A., Benson, R. B. J. & Barrett, P. M. Climate-mediated  
732 diversification of turtles in the Cretaceous. *Nat. Commun.* **6**, 7848 (2015).
- 733 26. Coiffard, C. & Gomez, B. Influence of latitude and climate on spread, radiation and  
734 rise to dominance of early angiosperms during the Cretaceous in the Northern  
735 Hemisphere. *Geol. Acta* **10**, 181–188 (2012).
- 736 27. Peralta-Medina, E. & Falcon-Lang, H. J. Cretaceous forest composition and  
737 productivity inferred from a global fossil wood database. *Geology* **40**, 219–222 (2012).
- 738 28. Shiono, T., Kusumoto, B., Yasuhara, M. & Kubota, Y. Roles of climate niche  
739 conservatism and range dynamics in woody plant diversity patterns through the  
740 Cenozoic. *Glob. Ecol. Biogeogr.* **27**, 865–874 (2018).
- 741 29. Jablonski, D. *et al.* Out of the tropics, but how? Fossils, bridge species, and thermal  
742 ranges in the dynamics of the marine latitudinal diversity gradient. *Proc. Natl. Acad.*  
743 *Sci.* **110**, 10487–10494 (2013).
- 744 30. Donoghue, M. J. A phylogenetic perspective on the distribution of plant diversity.  
745 *Proc. Natl. Acad. Sci.* **105**, 11549–11555 (2008).
- 746 31. Wiens, J. & Donoghue, M. Historical biogeography, ecology and species richness.  
747 *Trends Ecol. Evol.* **19**, 639–644 (2004).
- 748 32. Ricklefs, R. E. Global variation in the diversification rate of passerine birds. *Ecology*  
749 **87**, 2468–2478 (2006).



- 750 33. Rolland, J., Condamine, F. L., Jiguet, F. & Morlon, H. Faster speciation and reduced  
751 extinction in the tropics contribute to the mammalian latitudinal diversity gradient.  
752 *PLoS Biol.* **12**, e1001775 (2014).
- 753 34. Wiens, J. J. Global patterns of diversification and species richness in amphibians. *Am.*  
754 *Nat.* **70**, S86–S106 (2007).
- 755 35. Pyron, R. A. & Wiens, J. J. Large-scale phylogenetic analyses reveal the causes of high  
756 tropical amphibian diversity. *Proc. R. Soc. London B Biol. Sci.* **280**, 20131622 (2013).
- 757 36. Cardillo, M., Orme, C. D. L. & Owens, I. P. F. Testing for latitudinal bias in  
758 diversification rates: An example using new world birds. *Ecology* **86**, 2278–2287  
759 (2005).
- 760 37. Weir, J. T. & Schluter, D. The latitudinal gradient in recent speciation and extinction  
761 rates of birds and mammals. *Science* **315**, 1574–1576 (2007).
- 762 38. Condamine, F. L., Sperling, F. A. H., Wahlberg, N., Rasplus, J.-Y. & Kergoat, G. J.  
763 What causes latitudinal gradients in species diversity? Evolutionary processes and  
764 ecological constraints on swallowtail biodiversity. *Ecol. Lett.* **15**, 267–277 (2012).
- 765 39. Leslie, A. B. *et al.* Hemisphere-scale differences in conifer evolutionary dynamics.  
766 *Proc. Natl. Acad. Sci.* **109**, 16217–16221 (2012).
- 767 40. Siqueira, A. C., Oliveira-Santos, L. G. R., Cowman, P. F. & Floeter, S. R. Evolutionary  
768 processes underlying latitudinal differences in reef fish biodiversity. *Glob. Ecol.*  
769 *Biogeogr.* **25**, 1466–1476 (2016).
- 770 41. Pyron, R. A. Temperate extinction in squamate reptiles and the roots of latitudinal  
771 diversity gradients. *Glob. Ecol. Biogeogr.* **23**, 1126–1134 (2014).
- 772 42. Martin, P. S. & Klein, R. G. *Quaternary extinctions: a prehistoric revolution.*  
773 (University of Arizona Press, 1989).
- 774 43. Latham, R. E. & Ricklefs, R. E. in *Species Diversity in Ecological Communities:*

- 775 *Historical and Geographical Perspectives* 294–314 (University Of Chicago Press,  
776 1993).
- 777 44. Markwick, P. J. Fossil crocodylians as indicators of Late Cretaceous and Cenozoic  
778 climates: Implications for using palaeontological data in reconstructing palaeoclimate.  
779 *Palaeogeogr. Palaeoclimatol. Palaeoecol.* **137**, 205–271 (1998).
- 780 45. Roy, K. & Pandolfi, J. M. in *Climate Change and Biodiversity* (ed. Thomas, E. et al.)  
781 160–175 (Yale University Press, 2005).
- 782 46. Hawkins, B. A., Diniz-Filho, J. A. F., Jaramillo, C. A. & Soeller, S. A. Post-Eocene  
783 climate change, niche conservatism, and the latitudinal diversity gradient of New  
784 World birds. *J. Biogeogr.* **33**, 770–780 (2006).
- 785 47. Dunn, R. R. *et al.* Climatic drivers of hemispheric asymmetry in global patterns of ant  
786 species richness. *Ecol. Lett.* **12**, 324–333 (2009).
- 787 48. Eiserhardt, W. L., Borchsenius, F., Plum, C. M., Ordonez, A. & Svenning, J.-C.  
788 Climate-driven extinctions shape the phylogenetic structure of temperate tree floras.  
789 *Ecol. Lett.* **18**, 263–272 (2015).
- 790 49. Pulido-Santacruz, P. & Weir, J. T. Extinction as a driver of avian latitudinal diversity  
791 gradients. *Evolution* **70**, 860–872 (2016).
- 792 50. Rolland, J., Condamine, F. L., Beeravolu, C. R., Jiguet, F. & Morlon, H. Dispersal is a  
793 major driver of the latitudinal diversity gradient of Carnivora. *Glob. Ecol. Biogeogr.*  
794 **24**, 1059–1071 (2015).
- 795 51. Rabosky, D. L. Extinction rates should not be estimated from molecular phylogenies.  
796 *Evolution* **6**, 1816–1824 (2010).
- 797 52. Sanmartín, I. & Meseguer, A. S. Extinction in phylogenetics and biogeography: from  
798 timetrees to patterns of biotic assemblage. *Frontiers in Genetics* **7**, 35 (2016).
- 799 53. Mayr, G. The early Eocene birds of the Messel fossil site: A 48 million-year-old bird

- 800 community adds a temporal perspective to the evolution of tropical avifaunas. *Biol.*  
801 *Rev.* **92**, 1174–1188 (2016).
- 802 54. Wilf, P., Labandeira, C. C., Johnson, K. R. & Cuneo, N. R. Richness of plant-insect  
803 associations in Eocene Patagonia: A legacy for South American biodiversity. *Proc.*  
804 *Natl. Acad. Sci.* **10**, 8944–8948 (2005).
- 805 55. Blois, J. L. & Hadly, E. A. Mammalian response to Cenozoic climatic change. *Annu.*  
806 *Rev. Earth Planet. Sci.* **37**, 181–208 (2009).
- 807 56. Smith, R. Y. & al., et. Early Eocene plant diversity and dynamics in the Falkland flora,  
808 Okanagan Highlands, British Columbia, Canada. *Palaeobiodivers. Palaeoenviron.* **92**,  
809 309–328 (2012).
- 810 57. Xing, Y., Onstein, R. E., Carter, R. J., Stadler, T. & Peter Linder, H. Fossils and a large  
811 molecular phylogeny show that the evolution of species richness, generic diversity, and  
812 turnover rates are disconnected. *Evolution* **68**, 2821–2832 (2014).
- 813 58. Frederiksen, N. O. Sporomorph biostratigraphy, floral changes, and paleoclimatology,  
814 Eocene and earliest Oligocene of the eastern Gulf Coast. *U.S. Geol. Surv.* 1–68 (1988).
- 815 59. Greenwood, D. R. & Wing, S. L. Eocene continental climates and latitudinal  
816 temperature gradients. *Geology* **23**, 1044–1048 (1995).
- 817 60. Johnson, K. R. & Ellis, B. A tropical rainforest in Colorado 1.4 million years after the  
818 Cretaceous-Tertiary boundary. *Science* **296**, 2379–2383 (2002).
- 819 61. Morley, R. J. in *Tropical Rainforest Responses to Climatic Change* (eds. Bush, M. B.  
820 & Flenley, J.-R.) 1–31 (Springer, 2007).
- 821 62. Ziegler, A. *et al.* Tracing the tropics across land and sea: Permian to present. *Lethaia*  
822 **36**, 227–254 (2003).
- 823 63. Sluijs, A. *et al.* Subtropical Arctic Ocean temperatures during the Palaeocene/Eocene  
824 thermal maximum. *Nature* **441**, 610–613 (2006).

- 825 64. Zachos, J. C., Dickens, G. R. & Zeebe, R. E. An early Cenozoic perspective on  
826 greenhouse warming and carbon-cycle dynamics. *Nature* **451**, 279–283 (2008).
- 827 65. Jablonski, D., Roy, K. & Valentine, J. W. Out of the tropics: evolutionary dynamics of  
828 the latitudinal diversity gradient. *Science* **314**, 102–106 (2006).
- 829 66. Stebbins, G. L. *Flowering plants: evolution above the species level*. (Harvard  
830 University Press, 1974).
- 831 67. Meseguer, A. S. *et al.* Reconstructing deep-time paleoclimate legacies in the clusioid  
832 Malpighiales unveils their role in the evolution and extinction of the boreotropical  
833 flora. *Glob. Ecol. Biogeogr.* **27**, 616–628 (2018).
- 834 68. Kindlmann, P., Schödelbauerová, I. & Dixon, A. F. G. in *Scaling biodiversity* 246–257  
835 (Cambridge University Press, 2007). doi:10.1016/0169-5347(89)90163-8
- 836 69. Angielczyk, K. D., Burroughs, R. W. & Feldman, C. R. Do turtles follow the rules?  
837 Latitudinal gradients in species richness, body size, and geographic range area of the  
838 world’s turtles. *J. Exp. Zool. Part B Mol. Dev. Evol.* **324**, 270–294 (2015).
- 839 70. Maddison, W. P., Midford, P. E. & Otto, S. P. Estimating a binary character’s effect on  
840 speciation and extinction. *Syst. Biol.* **56**, 701–710 (2007).
- 841 71. FitzJohn, R. G. Diversitree: comparative phylogenetic analyses of diversification in R.  
842 *Methods Ecol. Evol.* **3**, 1084–1092 (2012).
- 843 72. Goldberg, E. E., Lancaster, L. T. & Ree, R. H. Phylogenetic inference of reciprocal  
844 effects between geographic range evolution and diversification. *Syst. Biol.* **60**, 451–465  
845 (2011).
- 846 73. Davis, M. P., Midford, P. E. & Maddison, W. Exploring power and parameter  
847 estimation of the BiSSE method for analyzing species diversification. *BMC Evol. Biol.*  
848 **13**, 38 (2013).
- 849 74. Silvestro, D., Schnitzler, J., Liow, L. H., Antonelli, A. & Salamin, N. Bayesian

- 850 estimation of speciation and extinction from incomplete fossil occurrence data. *Syst.*  
851 *Biol.* **63**, 349–367 (2014).
- 852 75. Ree, R. H. & Smith, S. A. Maximum likelihood inference of geographic range  
853 evolution by dispersal, local extinction, and cladogenesis. *Syst. Biol.* **57**, 4–14 (2008).
- 854 76. Joyce, W. G., Rabi, M., Clark, J. M. & Xu, X. A toothed turtle from the Late Jurassic  
855 of China and the global biogeographic history of turtles. *BMC Evol. Biol.* **16**, 236  
856 (2016).
- 857 77. Jansson, R., Rodríguez-Castañeda, G. & Harding, L. E. What can multiple phylogenies  
858 say about the latitudinal diversity gradient? A new look at the tropical conservatism,  
859 out of the tropics, and diversification rate hypotheses. *Evolution* **67**, 1741–1755 (2013).
- 860 78. Albino, A. M. & Brizuela, S. An overview of the South American fossil squamates.  
861 *Anat. Rec.* **297**, 349–368 (2014).
- 862 79. Pereira, A. G., Sterli, J., Moreira, F. R. R. & Schrago, C. G. Multilocus phylogeny and  
863 statistical biogeography clarify the evolutionary history of major lineages of turtles.  
864 *Mol. Phylogenet. Evol.* **113**, 59–66 (2017).
- 865 80. Rodrigues, J. F. M., Olalla-Tárraga, M. Á., Iverson, J. B., Akre, T. S. B. & Diniz-Filho,  
866 J. A. F. Time and environment explain the current richness distribution of non-marine  
867 turtles worldwide. *Ecography* **40**, 1402–1411 (2017).
- 868 81. Linnert, C. *et al.* Evidence for global cooling in the Late Cretaceous. *Nat. Commun.* **5**,  
869 4194 (2014).
- 870 82. Vellekoop, J. *et al.* Rapid short-term cooling following the Chicxulub impact at the  
871 Cretaceous-Paleogene boundary. *Proc. Natl. Acad. Sci.* **111**, 7537–7541 (2014).
- 872 83. Kaiho, K. *et al.* Global climate change driven by soot at the K-Pg boundary as the  
873 cause of the mass extinction. *Sci. Rep.* **6**, 28427 (2016).
- 874 84. Waterson, A. M. *et al.* Modelling the climatic niche of turtles: A deep-time perspective.

- 875 *Proc. R. Soc. B Biol. Sci.* **283**, 20161408 (2016).
- 876 85. Kerkhoff, A. J., Moriarty, P. E. & Weiser, M. D. The latitudinal species richness  
877 gradient in New World woody angiosperms is consistent with the tropical conservatism  
878 hypothesis. *Proc. Natl. Acad. Sci.* **111**, 8125–8130 (2014).
- 879 86. Meseguer, A. S., Lobo, J. M., Ree, R. H., Beerling, D. J. & Sanmartin, I. Integrating  
880 fossils, phylogenies, and niche models into biogeography to reveal ancient evolutionary  
881 history: the case of *Hypericum* (Hypericaceae). *Syst. Biol.* **64**, 215–232 (2015).
- 882 87. Ge, D. *et al.* Evolutionary History of Lagomorphs in Response to Global  
883 Environmental Change. *PLoS One* **8**, e59668 (2013).
- 884 88. Pisano, J. *et al.* Out of Himalaya: The impact of past Asian environmental changes on  
885 the evolutionary and biogeographical history of Dipodoidea (Rodentia). *J. Biogeogr.*  
886 **42**, 856–870 (2015).
- 887 89. Condamine, F. L., Rolland, J., Höhna, S., Sperling, F. A. H. & Sanmartín, I. Testing  
888 the Role of the Red Queen and Court Jester as Drivers of the Macroevolution of Apollo  
889 Butterflies. *Syst. Biol.* doi.org/10.1093/sysbio/syy009 (2018).  
890 doi:10.1093/sysbio/syy009
- 891 90. Stephens, P. R. & Wiens, J. J. Explaining species richness from continents to  
892 communities: The time-for-speciation effect in emydid turtles. *Am. Nat.* **161**, 112–128  
893 (2003).
- 894 91. Allen, A. P., Gillooly, J. F., Savage, V. M. & Brown, J. H. Kinetic effects of  
895 temperature on rates of genetic divergence and speciation. *Proc. Natl. Acad. Sci.* **103**,  
896 9130–9135 (2006).
- 897 92. Antonelli, A. & Sanmartín, I. Mass extinction, gradual cooling, or rapid radiation?  
898 Reconstructing the spatiotemporal evolution of the ancient angiosperm genus  
899 *Hedyosmum* (Chloranthaceae) using empirical and simulated approaches. *Syst. Biol.*

- 900           **60**, 596–615 (2011).
- 901   93.   Sun, Y. *et al.* Lethally Hot Temperatures During the Early Triassic Greenhouse.  
902           *Science* **338**, 366–370 (2012).
- 903   94.   Crisp, M. D. & Cook, L. G. How was the Australian flora assembled over the last 65  
904           million years? A molecular phylogenetic perspective. *Annu. Rev. Ecol. Evol. Syst.* **44**,  
905           303–324 (2013).
- 906   95.   Morlon, H., Parsons, T. L. & Plotkin, J. B. Reconciling molecular phylogenies with the  
907           fossil record. *Proc. Natl. Acad. Sci.* **108**, 16327–16332 (2011).
- 908   96.   May, M. R., Højhna, S. & Moore, B. R. A Bayesian approach for detecting the  
909           impact of mass-extinction events on molecular phylogenies when rates of lineage  
910           diversification may vary. *Methods Ecol. Evol.* **7**, 947–959 (2016).
- 911   97.   Heath, T. A., Huelsenbeck, J. P. & Stadler, T. The fossilized birth-death process for  
912           coherent calibration of divergence-time estimates. *Proc. Natl. Acad. Sci.* **111**, E2957–  
913           E2966 (2014).
- 914   98.   Spriggs, E. L. *et al.* Temperate radiations and dying embers of a tropical past: the  
915           diversification of *Viburnum*. *New Phytol.* **207**, 1469–8137 (2015).
- 916   99.   Fritz, S. A. *et al.* Diversity in time and space: wanted dead and alive. *Trends Ecol.*  
917           *Evol.* **28**, 509–516 (2013).
- 918   100.   Jaffe, A. L., Slater, G. J. & Alfaro, M. E. The evolution of island gigantism and body  
919           size variation in tortoises and turtles. *Biol. Lett.* **7**, 558–561 (2011).
- 920   101.   Rodrigues, J. F. M. & Diniz-Filho, J. A. F. Ecological opportunities, habitat, and past  
921           climatic fluctuations influenced the diversification of modern turtles. *Mol. Phylogenet.*  
922           *Evol.* **101**, 352–358 (2016).
- 923   102.   Shaffer, H. B., McCartney-Melstad, E., Near, T. J., Mount, G. G. & Spinks, P. Q.  
924           Phylogenomic analyses of 539 highly informative loci dates a fully resolved time tree

- 925 for the major clades of living turtles (Testudines). *Mol. Phylogenet. Evol.* **115**, 7–15  
926 (2017).
- 927 103. Oaks, J. R. A time-calibrated species tree of crocodylia reveals a recent radiation of the  
928 true crocodiles. *Evolution* **65**, 3285–3297 (2011).
- 929 104. FitzJohn, R. G., Maddison, W. P. & Otto, S. P. Estimating traitdependent speciation  
930 and extinction rates from incompletely resolved phylogenies. *Syst. Biol.* **58**, 595–611  
931 (2009).
- 932 105. Silvestro, D., Salamin, N. & Schnitzler, J. PyRate: A new program to estimate  
933 speciation and extinction rates from incomplete fossil data. *Methods Ecol. Evol.* **5**,  
934 1126–1131 (2014).
- 935 106. Silvestro, D., Cascales-Miñana, B., Bacon, C. D. & Antonelli, A. Revisiting the origin  
936 and diversification of vascular plants through a comprehensive Bayesian analysis of the  
937 fossil record. *New Phytol.* **207**, 1469–8137 (2015).
- 938 107. Gradstein, F. M., Ogg, J. G. & Smith, A. G. A Geologic Time Scale 2004. *A Geol.*  
939 *Time Scale 2004, Ed. by Felix M. Gradstein James G. Ogg Alan G. Smith* (2005).
- 940 108. Gelman, A. Parameterization and Bayesian modeling. *J. Am. Stat. Assoc.* **99**, 537–545  
941 (2004).
- 942 109. Rambaut, A. & Drummond, A. J. Tracer. Version 1.3. *Available online*  
943 *at:*<http://beast.bio.ed.ac.uk/Tracer>
- 944 110. Romdal, T. S., Araújo, M. B. & Rahbek, C. Life on a tropical planet: niche  
945 conservatism and the global diversity gradient. *Glob. Ecol. Biogeogr.* **22**, 344–350  
946 (2013).
- 947 111. Smith, S. A. Taking into account phylogenetic and divergence-time uncertainty in a  
948 parametric biogeographical analysis of the Northern Hemisphere plant clade  
949 Caprifolieae. *J. Biogeogr.* **36**, 2324–2337 (2009).



- 950 112. Moore, B. R., Smith, S. a., Ree, R. H. & Donoghue, M. J. Incorporating Fossil Data in  
951 Biogeographic Inference: A Likelihood Approach. in *Proc. 52nd Annu. Syst.*  
952 *Symposium* (2008).
- 953 113. Ree, R. H. & Sanmartin, I. Prospects and challenges for parametric models in historical  
954 biogeographical inference. *J. Biogeogr.* **36**, 1211–1220 (2009).
- 955
- 956
